1 **A ferredoxin bridge connects the two arms of plant**  
2 **mitochondrial complex I**

3

4

5

6 Niklas Klusch<sup>1</sup>, Jennifer Senkler<sup>2</sup>, Özkan Yildiz<sup>1</sup>, Werner Kühlbrandt<sup>1,\*</sup>, Hans-Peter Braun<sup>2,\*</sup>

7

8 <sup>1</sup> Department of Structural Biology, Max-Planck-Institute of Biophysics, Max-von-Laue-Straße  
9 3, 60438 Frankfurt, Germany

10

11 <sup>2</sup> Institut für Pflanzengenetik, Leibniz Universität Hannover, Herrenhäuser Str. 2, 30419  
12 Hannover, Germany

13

14 \*Correspondence:

15 [braun@genetik.uni-hannover.de](mailto:braun@genetik.uni-hannover.de)

16 [werner.kuehlbrandt@biophys.mpg.de](mailto:werner.kuehlbrandt@biophys.mpg.de)

17

18

19 Short title:

20 Complex I structure of algae and plants

21

22 One sentence summary:

23 The activity of complex I depends on the angle between its two arms, which, in plants, is  
24 adjusted by a protein bridge that includes an unusual ferredoxin.

25

26 The authors responsible for distribution of materials integral to the findings presented in this  
27 article in accordance with the policy described in the Instructions for Authors  
28 ([www.plantcell.org](http://www.plantcell.org)) are: Hans-Peter Braun ([braun@genetik.uni-hannover.de](mailto:braun@genetik.uni-hannover.de)) and Werner  
29 Kühlbrandt ([werner.kuehlbrandt@biophys.mpg.de](mailto:werner.kuehlbrandt@biophys.mpg.de)).

30

31 **SUMMARY**

32

33 Mitochondrial complex I is the main site for electron transfer to the respiratory chain and  
34 generates much of the proton gradient across the inner mitochondrial membrane. It is  
35 composed of two arms, which form a conserved L-shape. We report the structures of the  
36 intact, 47-subunit mitochondrial complex I from *Arabidopsis thaliana* and from the green  
37 alga *Polytomella* sp. at 3.2 and 3.3 Å resolution. In both, a heterotrimeric  $\gamma$ -carbonic  
38 anhydrase domain is attached to the membrane arm on the matrix side. Two states are  
39 resolved in *A. thaliana* complex I, with different angles between the two arms and different  
40 conformations of the ND1 loop near the quinol binding site. The angle appears to depend on  
41 a bridge domain, which links the peripheral arm to the membrane arm and includes an  
42 unusual ferredoxin. We suggest that the bridge domain regulates complex I activity.

43

44 **1. INTRODUCTION**

45

46 Complex I is the largest enzyme complex of the mitochondrial electron-transfer chain. It  
47 catalyzes electron transfer from NADH onto ubiquinone, which is coupled to proton  
48 translocation across the inner mitochondrial membrane (Agip et al., 2019; Parey et al., 2020;  
49 Sazanov, 2015). Bacterial and mitochondrial complex I consist of two parts: the membrane  
50 arm and the peripheral arm. The membrane arm is integral to the mitochondrial or bacterial  
51 inner membrane, while the peripheral arm protrudes into the bacterial cytoplasm or the  
52 mitochondrial matrix. Together, the two arms form an L shape. Each arm has two functional  
53 domains: in the peripheral arm these are the NADH-oxidation (N) and the ubiquinone  
54 reduction (Q) domains, in the membrane arm they are the proximal (relative to the  
55 peripheral arm) and distal proton translocating domains ( $P_P$  and  $P_D$  domains).

56

57 The first high-resolution structures of complex I were of bacterial origin (Baradaran et al.,  
58 2013; Berrisford et al., 2016). *E. coli* complex I has a mass of about 500 kDa and is composed  
59 of 14 protein subunits, 7 of which reside in the membrane and 7 in the peripheral arm. This  
60 set of conserved subunits forms the core of complex I. Electrons are transferred from NADH  
61 to ubiquinone via one flavin mononucleotide (FMN) and 8 or 9 FeS clusters in the peripheral  
62 arm. The membrane arm has four potential proton translocation pathways. The molecular  
63 mechanisms that couple electron transfer to proton translocation are unknown but thought  
64 to involve long-range conformational changes between and within the two complex I arms.

65

66 Mitochondrial complex I is significantly larger. Apart from the 14 core subunits, it contains  
67 around 30 accessory subunits. The first higher-resolution structures of mitochondrial  
68 complex I were from the aerobic yeast *Yarrowia lipolytica* (Zickermann et al., 2015) and  
69 mammalian mitochondria (Fiedorczuk et al., 2016; Zhu et al., 2016). Recently, more detailed  
70 cryoEM structures were reported for fungal (Grba & Hirst, 2020; Parey et al., 2018) and  
71 mammalian complex I (Agip et al., 2018; Kampjut & Sazanov, 2020). Mammalian complex I has  
72 45 subunits and a mass of about 970 kDa. The accessory subunits surround the core subunits

73 and are thought to stabilize the complex. Some of the accessory subunits add new functions  
74 to complex I. For instance, two copies of a mitochondrial acyl carrier protein (ACP; also  
75 called the SDAP subunit) are integral parts of the mammalian and yeast complex I.  
76 Furthermore, a nucleoside kinase is attached to complex I in mammals and a sulfur  
77 transferase to that of *Yarrowia* (D'Imprima et al., 2016).

78

79 Plants have two different forms of complex I, one each for chloroplasts and mitochondria.  
80 The chloroplast complex resembles that of cyanobacteria, which transfers electrons from  
81 ferredoxin to plastoquinone. The high-resolution structure of cyanobacterial complex I has  
82 recently been resolved by cryoEM (Laughlin et al., 2019; Schuller et al., 2019; Zhang et al.,  
83 2020). The structure of plant mitochondrial complex I is less well characterized. Low-  
84 resolution single-particle EM revealed a second matrix-exposed domain, which is attached to  
85 the membrane arm at a central position (Dudkina et al., 2005). Plant complex I includes  
86 additional subunits not present in complex I from *Yarrowia* and mammals (Heazlewood et  
87 al., 2003), most notably proteins resembling  $\gamma$ -type carbonic anhydrases ( $\gamma$ CAs) (Parisi et al.,  
88 2004; Perales et al., 2004). The  $\gamma$ CAs form a heterotrimer and were shown to constitute the  
89 extra matrix-exposed domain (Fromm et al., 2016; Sunderhaus et al., 2006). It has been  
90 proposed that the  $\gamma$ CA domain is involved in the transfer of mitochondrial CO<sub>2</sub> to the  
91 chloroplasts for carbon fixation (Braun & Zabaleta, 2007). First insights into the structure of  
92 this domain come from single-particle cryoEM of a complex I assembly intermediate from  
93 mung bean, which includes 30 of its >45 subunits (Maldonado et al., 2020).

94

95 Here we report the high-resolution cryoEM structures of complete complex I from the model  
96 plant *Arabidopsis thaliana* in the open and closed state, and from the unicellular  
97 heterotrophic green alga *Polytomella* sp. in the closed state. We present new structural and  
98 functional insights into plant-specific features of mitochondrial complex I, most notably a  
99 protein bridge, which links the peripheral arm to the membrane arm. The bridge appears to  
100 adjust the angle between the two complex I arms and may be involved in regulating  
101 complex I activity. A recent cryoEM study (Soufari et al., 2020) provides insights into the  
102 structure of complex I from cabbage but the map is of lower resolution, shows only one  
103 state and the complex is incomplete. In particular, it lacks the bridge domain.

104

105

## 106 **2. RESULTS and DISCUSSION**

107

### 108 **2.1 Structure of the intact *Arabidopsis* and *Polytomella* complex I**

109

110 Intact mitochondrial complex I from *Arabidopsis* was purified as described (Supp. Fig. 1,  
111 (Klodmann et al., 2010); *Polytomella* sp. complex I was isolated by a similar protocol (Supp.  
112 Fig. 2). Single-particle cryoEM yielded a 3.4 Å map of *Arabidopsis* complex I and a 3.5 Å map  
113 for the *Polytomella* complex. Multibody refinement of the peripheral arm, the membrane  
114 arm and the P<sub>P</sub> and P<sub>D</sub> domains of the membrane arm improved the resolution of  
115 *Arabidopsis* complex I up to 3.2 Å and that of *Polytomella* complex I to 3.3 Å (Supp. Figures

116 3-6). Both have the typical L shape. The  $\gamma$ CA domain, which is characteristic for plant  
117 mitochondrial complex I, shows up prominently on the matrix side in both maps. The  
118 membrane arm is connected by a protein bridge near the  $\gamma$ CA domain to the Q domain of  
119 the peripheral arm.

120

121

### 122 **2.1.1 Subunit composition and complete model of *Arabidopsis* mitochondrial complex I**

123

124 *Arabidopsis* complex I consists of 47 subunits (Figure 1, Video 1), including 14 core subunits  
125 and 33 accessory subunits (Table 1). We use the subunit designations for bovine complex I  
126 (Walker et al., 1992) wherever possible (see Supp. Table 1 for nomenclature). Of the 33  
127 accessory subunits, 24 are conserved and found in both mammalian and plant complex I  
128 (Senkler et al., 2017a). Additionally, our structure indicates two copies of the acyl carrier  
129 protein (SDAP1 and SDAP2), which were assumed to be absent in plant complex I (Meyer et  
130 al., 2007), raising the number of conserved accessory subunits to 26. The remaining 7  
131 accessory subunits seem to be plant-specific. These are three members of the  $\gamma$ CA/CAL  
132 family; the so-called P1 and P2 proteins (Meyer, 2012); a small unknown hydrophobic  
133 subunit on the side of the membrane arm (Supp. Fig. 7); and a ferredoxin, which we refer to  
134 as C1-FDX (complex I ferredoxin).

135

136 Four complex I subunits that were previously identified in *Arabidopsis* by mass spectrometry  
137 (Supp. Fig. 8) are absent in our structure: (i) a L-galactono-1,4-lactone dehydrogenase; (ii) a  
138 TIM-like protein (*Arabidopsis* accessions At1g18320 and At3g10110); (iii) subunit B14.7; (iv)  
139 subunit SGD. Of these, GLDH only binds to assembly intermediates of complex I (Schertl et  
140 al., 2012) and is not expected in the holo complex, as recently confirmed by cryoEM (Soufari  
141 et al., 2020). The TIM-like protein may not be a true complex I subunit but might have been  
142 co-purified in earlier preparations. B14.7 is conserved in mammals, *Yarrowia* and  
143 *Polytomella*, where its main role is thought to be in supercomplex formation (Kampjut &  
144 Sazanov, 2020; Letts et al., 2016). As a large fraction of *Arabidopsis* complex I forms a  
145 supercomplex with complex III<sub>2</sub> (Eubel et al., 2003), the B14.7 subunit may have dissociated  
146 during complex I preparation. The SGD subunit, like B14.7, is a conserved accessory subunit  
147 of mitochondrial complex I. Its location in mammalian complex I corresponds to that of the  
148 plant-specific P1 subunit in *Arabidopsis*. Since mammalian SGD and *Arabidopsis* P1 share  
149 some sequence similarity (Supp. Fig. 9), we conclude that P1 is a plant equivalent of SGD. In  
150 total, *Arabidopsis* complex I consists of 47 subunits plus subunit B14.7 (Table 1), which  
151 makes it the largest complex I assembly characterized to date.

152

153 Apart from the 47 protein subunits, our structure of *Arabidopsis* complex I indicates 15  
154 cofactors, including 11 in the peripheral arm (8 FeS clusters, 1 FMN, 1 Zn<sup>2+</sup> and 1 NADPH),  
155 and four in the membrane arm (2 phosphopantetheine groups, 1 Zn<sup>2+</sup> and 1 Fe ion), plus  
156 eight lipids and one bound LMNG detergent molecule (Supp. Fig. 10) in the membrane arm.

157

158 *Arabidopsis* complex I was prepared without added substrates, and therefore the NADH  
159 oxidation site is empty, as expected. However, the complex binds ubiquinone at site 2 in the  
160 Q tunnel between the lipid bilayer and the Q reduction site, as previously described for  
161 *Yarrowia* complex I (Parey et al., 2019).

162

163

164

165

### 166 **2.1.2 Subunit composition and model of *Polytomella* mitochondrial complex I**

167

168 The subunit composition of complex I from *Polytomella* sp. has been less well defined. We  
169 analyzed purified *Polytomella* complex I by 2D SDS/PAGE and mass spectrometry (Supp.  
170 Figures 11-14). In total, we identified peptides of 40 subunits that resembled known complex  
171 I components from other organisms, in particular *Chlamydomonas*. Shotgun MS analyses  
172 revealed another four polypeptides, raising the total number of subunits to 44 (Supp. Fig. 11;  
173 see also the GelMap at [www.gelmap.de/2062](http://www.gelmap.de/2062) [password: Poly-C1]). Since the mass  
174 spectrometry data did not cover the complete amino acid sequences especially of the  
175 hydrophobic subunits, additional peptide sequence information was derived from genomes.  
176 The genome sequence of *Chlamydomonas* is known (Merchant et al., 2007). A partial  
177 genome sequence of *Polytomella* sp. has been determined recently (Murphy et al., 2019),  
178 but remains to be fully annotated. We used exon-intron prediction programs to identify  
179 open readings frames that encode the complete polypeptide sequences of complex I  
180 subunits in *Polytomella*.

181

182 We were able to assign 43 subunits in the 3.3 Å cryo-EM map of *Polytomella* complex I  
183 (Figure 2, Video 2), including the complete set of the 14 core subunits and 29 of the  
184 accessory subunits (Table 1). In addition, three accessory subunits not identified by MS were  
185 assigned on the basis of their map density (Supp. Figure 15), bringing the total to 46. 31 of  
186 the 32 accessory subunits are conserved between *Polytomella* and *Arabidopsis*, indicating a  
187 remarkably similar subunit composition of mitochondrial complex I in plants and algae. The  
188 plant-specific P1 and P2 subunits are absent in *Polytomella*. As in *Arabidopsis*, *Yarrowia* and  
189 mammals, the acyl carrier proteins (SDAP1 and 2) bind in two distinct locations. The  
190 *Polytomella* ferredoxin-like subunit C1-FDX is a homolog of the NUOP3 subunit previously  
191 identified in *Chlamydomonas* complex I (Cardol et al., 2008; Cardol et al., 2005; Cardol et al.,  
192 2004). The small unknown hydrophobic subunit at the side of the *Arabidopsis* membrane  
193 arm is conserved in *Polytomella*, but its sequence was not determined. In contrast to  
194 *Arabidopsis*, the B14.7 subunit is present in the *Polytomella* complex I structure. As in  
195 mammals and *Yarrowia*, it is found at the position where complex I interacts with the  
196 complex III dimer within the I+III<sub>2</sub> supercomplex. Subunits NUOP4 and NUOP5, which were  
197 detected by mass spectrometry in *Polytomella* and *Chlamydomonas* complex I (Table 1,  
198 Cardol et al., 2005; Cardol et al., 2004), were not found in the *Polytomella* cryoEM map. A  
199 few regions of the *Polytomella* map were left unassigned (Supp. Fig. 16). These map regions  
200 may belong to unknown parts of the identified subunits, or to new subunits that remain to

201 be identified. The overall structures of *Arabidopsis* and *Polytomella* complexes I are similar,  
202 including the trimeric  $\gamma$ CA domain and the bridge connecting the Q domain of the peripheral  
203 arm to the membrane arm near the  $\gamma$ CA domain. *Polytomella* complex I appears to be more  
204 compact, perhaps because some of its subunits are longer than in *Arabidopsis* and thus can  
205 form stronger contacts.

206

207 Apart from its 46 protein subunits, our structure of *Polytomella* complex I indicates 13 bound  
208 co-factors (8 FeS clusters, 1 FMN, 1  $Zn^{2+}$  and 1 NADPH in the peripheral arm, two  
209 phosphopantetheine groups in the two acyl carrier subunits of the membrane arm), plus 12  
210 lipid molecules (Supp. Fig. 17).

211

212

## 213 **2.2 The $\gamma$ -carbonic anhydrase heterotrimer in *Arabidopsis* and *Polytomella***

214

215 In plant mitochondria, a heterotrimeric  $\gamma$ CA domain is attached to the membrane arm of  
216 complex I (Braun, 2020; Fromm et al., 2016; Sunderhaus et al., 2006). The  $\gamma$ CA domain is  
217 absent in complex I from mammals, fungi, bacteria and chloroplasts but seems to occur in  
218 several groups of protists (Gawryluk & Gray, 2010). This suggests that the  $\gamma$ CA proteins are of  
219 ancient origin and most likely formed part of complex I in the earliest ancestors of the  
220 eukaryotic clade. The *Arabidopsis* genome encodes five different  $\gamma$ CA subunits, all of them  
221 associated with mitochondrial complex I (Klodmann et al., 2010). Of these, three have the  
222 conserved amino acid residues that form the active site, as in the prototypic  $\gamma$ -carbonic  
223 anhydrase of the archaeon *Methanosarcina thermophila* (Kisker et al., 1996). They are  
224 referred to as  $\gamma$ CA1,  $\gamma$ CA2 and  $\gamma$ CA3 (Parisi et al., 2004). Two others are known as gamma  
225 carbonic anhydrase-like proteins  $\gamma$ CAL1 and  $\gamma$ CAL2 (Perales et al., 2004). The complex I-  
226 integral  $\gamma$ CA/CAL proteins of *Arabidopsis* assemble into heterotrimers of two  $\gamma$ CA proteins  
227 and one  $\gamma$ CAL (Braun, 2020; Fromm et al., 2016), but the precise composition of the trimers  
228 was unknown. Our complex I structure of *Arabidopsis* includes  $\gamma$ CA2,  $\gamma$ CA1 and  $\gamma$ CAL2, as  
229 indicated by evaluation of amino acid positions that differ between the  $\gamma$ CA and  $\gamma$ CAL  
230 proteins (Figure 3a,c; Supp. Fig. 18). Note that the high-resolution map of the *A. thaliana*  
231 complex suggests a mixed occupancy of the  $\gamma$ CA/CAL heterotrimer, because side chains of  
232 alternative but less abundant  $\gamma$ CA subunits can be fitted at some positions. This is in line with  
233 the finding that  $\gamma$ CA subunits can substitute for each other in *Arabidopsis* knockout lines  
234 (Fromm et al., 2016).

235

236 The fold of the  $\gamma$ CA/CAL proteins is highly conserved, consisting of a central left-handed  
237 triangular  $\beta$ -helix, which is laterally flanked by a C-terminal  $\alpha$ -helix (Supp. Fig. 19a,b). In  
238 contrast to *M. thermophila*,  $\gamma$ CA1 and  $\gamma$ CA2 each have a long amphiphilic alpha helix at the  
239 N-terminus, which is absent in  $\gamma$ CAL2. The two amphiphilic helices of  $\gamma$ CA1 and  $\gamma$ CA2 form a  
240 coiled coil parallel to the membrane arm on the matrix side of the inner mitochondrial  
241 membrane. A gap between the coiled coil and the membrane arm is filled with a distinct set  
242 of lipids, which might help to attach the  $\gamma$ CA domain to complex I (Supp. Fig. 19c). The  $\gamma$ CA  
243 domain interacts with the ND2 and B14.5b subunits, the plant-specific complex I protein P2



244 and C1-FDX (see below). Interaction of the  $\gamma$ CA trimer and the membrane arm is restricted to  
245 the P<sub>p</sub> module. The  $\gamma$ CA/CAL subunits are part of early assembly intermediates; in their  
246 absence, assembly of plant mitochondrial complex I is arrested (Ligas et al., 2019).

247

248 The archaeal  $\gamma$ CA of *M. thermophila* is a homotrimer with three active sites at the subunit  
249 interfaces, each with a zinc ion coordinated by three histidines, two of which belong to one  
250 and the third to another, neighboring subunit (Kisker et al., 1996). In *Arabidopsis*, only the  
251  $\gamma$ CA1/ $\gamma$ CA2 interface has a complete set of active-site histidines ( $\gamma$ CA1\_HisH130,  
252  $\gamma$ CA2\_HisH107 and  $\gamma$ CA2\_HisH135). Together these three side chains coordinate a metal  
253 (presumably Zn) ion in a non-peptide density (Figure 3c,e). The nearby conserved sidechains  
254  $\gamma$ CA1\_N99,  $\gamma$ CA1\_Q101  $\gamma$ CA1\_D102,  $\gamma$ CA1\_Y207 and  $\gamma$ CA2\_R86 are crucial for stability and  
255 the catalytic mechanism (Ferry, 2010; Iverson et al., 2000), suggesting that the  $\gamma$ CA1/ $\gamma$ CA2  
256 site is active. The two other sites in the heterotrimer lack some of the conserved zinc-binding  
257 residues, do not show a non-peptide density, and are therefore presumably inactive.

258

259 In *Polytomella*, three  $\gamma$ CA proteins and one  $\gamma$ CAL protein were identified by MS and  
260 evaluation of the partial genome sequence. Based on sequence similarity to *Arabidopsis*, we  
261 refer to the *Polytomella*  $\gamma$ CA subunits as  $\gamma$ CA1,  $\gamma$ CA2 and  $\gamma$ CA3. Of these,  $\gamma$ CA2 and  $\gamma$ CA3 are  
262 present in *Polytomella* complex I, in addition to one copy of  $\gamma$ CAL (Figure 3b and Supp. Fig.  
263 20). As in *Arabidopsis*, the structure of *Polytomella* complex I indicates a degree of mixed  
264 occupancy of  $\gamma$ CA subunits, because alternative, less abundant side chains can be fitted at  
265 some positions. It is therefore likely that a small fraction of *Polytomella* complex I contains  
266  $\gamma$ CA1,  $\gamma$ CA2 and  $\gamma$ CAL. The topological arrangement of the  $\gamma$ CA/CAL subunits and the  
267 anchoring of the  $\gamma$ CA domain by the coiled-coil N-terminal amphipathic helices is very similar  
268 to *Arabidopsis* (Supp. Fig. 21). Surprisingly, none of the three potential active sites at the  
269 subunit interfaces has the complete set of three zinc-coordinating residues (Figure 3d,f). At  
270 the  $\gamma$ CA2/ $\gamma$ CA3 interface, the third histidine is substituted by  $\gamma$ CA3\_S127 and nearby  
271 residues that participate in catalysis have been replaced. Since none of the three potential  
272 catalytic sites show any density for a bound metal ion, we conclude that the *Polytomella*  $\gamma$ CA  
273 domain is inactive.

274

275 In photosynthetically active organisms, carbonic anhydrases play a role in carbon  
276 assimilation and carbon concentration mechanisms or pH stabilization. It has been suggested  
277 that the carbonic anhydrase of complex I is required for the transfer of carbon dioxide from  
278 mitochondria to the chloroplasts for carbon fixation in the Calvin-Benson cycle (Braun &  
279 Zabaleta, 2007). Since *Polytomella*, unlike its close relative *C. reinhardtii*, does not  
280 photosynthesize, it might not need this activity. It recently has been found that  
281 cyanobacterial complex I is involved in carbon transport and concentration (Schuller et al.,  
282 2020). However, the cyanobacterial carbonic anhydrase subunits belong to a different  
283 enzyme class, and they are attached to the P<sub>D</sub> domain at the tip of the membrane arm.  
284 Furthermore, one of the proton transfer pathways in the cyanobacterial P<sub>D</sub> domain appears  
285 to have adapted to CO<sub>2</sub> transfer. In contrast, the  $\gamma$ CA domain of *Arabidopsis* mitochondrial  
286 complex I is attached to the P<sub>p</sub> domain and its active site is not close to a proton transfer

287 path. Our structure thus does not suggest that plant mitochondrial complex I is directly  
288 involved in CO<sub>2</sub> or bicarbonate transport across the inner mitochondrial membrane.  
289 However, bicarbonate formed at the  $\gamma$ CA domain might be exported from the mitochondrial  
290 matrix by transporters unrelated to complex I.

291

292

### 293 **2.3 A ferredoxin bridge between the ubiquinone-reduction and the $\gamma$ -carbonic anhydrase** 294 **domain**

295

296 A striking feature of the *Arabidopsis* and *Polytomella* mitochondrial complex I is a three-  
297 subunit protein bridge, which forms a physical link between the Q domain of the peripheral  
298 arm and the membrane arm (Figure 4). The bridge consists of (i) subunit B14 in the  
299 peripheral arm, (ii) one of the two acyl carrier proteins (SDAP2) with a bound  
300 phosphopantetheine and (iii) a ferredoxin-like subunit (here referred to as complex 1  
301 ferredoxin, C1-FRX). C1-FRX is connected to the core ND2 subunit of the membrane arm and  
302 the  $\gamma$ CAL2 subunit of the  $\gamma$ CA domain. The B14 and acyl carrier subunits are conserved in  
303 mammalian and *Yarrowia* complex I. The B14 subunit belongs to the eukaryotic LYR protein  
304 family (Angerer et al., 2014) that is defined by a [Leu, Tyr, Arg] motif close to the N-terminus.  
305 LYR proteins are comparatively small, mitochondria-specific and positively charged  
306 components of respiratory chain complexes or act as assembly factors. ISD11, another LYR  
307 protein, is part of the iron sulphur cluster (ISC) assembly complex. Mitochondrial acyl carrier  
308 proteins are confined to the mitochondrial matrix (Angerer et al., 2017), where they are  
309 involved in fatty acid biosynthesis, in particular lipoic acid, which is a prosthetic group of  
310 several mitochondrial enzymes, and possibly also longer fatty acids for membrane  
311 biogenesis. The two acyl carrier proteins bound to complex I both carry longer fatty acids,  
312 which interact with the LYR-like subunits B14 and B22. Finally, mitochondrial acyl carrier  
313 proteins are known to form part of the ISC assembly complex, bind to ISD11, and might have  
314 a regulatory role in FeS cluster biosynthesis (Lill, 2020).

315

316 Blue-native/ SDS PAGE did not identify the C1-FDX subunit in plant complex I, but low levels  
317 of a ferredoxin were detected by complexome profiling (Senkler et al., 2017b; Takabayashi  
318 et al., 2017). The *Arabidopsis* C1-FDX subunit is homologous to NUOP3, which is part of  
319 *Chlamydomonas* complex I (Cardol et al., 2005; Cardol et al., 2004). An *Arabidopsis* mutant  
320 lacking the gene encoding C1-FDX has decreased complex I levels (Hansen et al., 2018) but  
321 remains to be fully characterized. The copy number of *Arabidopsis* C1-FDX is estimated to be  
322 2600 per single mitochondrion by quantitative mass spectrometry, in excellent agreement  
323 with the copy number of average mitochondrial complex I subunits (2500 per single  
324 mitochondrion; (Fuchs et al., 2020). In our *Arabidopsis* complex I, prepared by sucrose  
325 density gradient centrifugation, C1-FDX clearly is an accessory complex I subunit. NUOP3,  
326 the *Polytomella* homolog of C1-FDX, is a structural subunit of the *Polytomella* bridge domain.

327

328 The 3D structure of *Arabidopsis* and *Polytomella* C1-FDX closely resembles mammalian and  
329 fungal mitochondrial ferredoxin 1 and 2, with its characteristic  $\beta$ -grasp fold (Supp. Fig. 22).



330 Furthermore, C1-FDX resembles two mitochondrial ferredoxins of *Arabidopsis* known as  
331 AtMFDX1 and AtMFDX2 (Takubo et al., 2003). Although sequence identity between C1-FDX  
332 and AtMFDX1/AtMFDX2 is low, the structure of C1-FDX and the predicted structures of  
333 AtMFDX1 and AtMFDX2 modelled on human mitochondrial ferredoxin are very similar  
334 (Supp. Fig. 23). Mitochondrial ferredoxins are involved in the formation of FeS clusters (Cai  
335 et al., 2017; Lange et al., 2000). Typically, they have a central 2Fe2S cluster themselves,  
336 coordinated by four conserved cysteine residues in the binding loop of the core domain. In  
337 *Arabidopsis* C1-FDX, one of these cysteines is substituted by a histidine (Figure 4). Judging  
338 from its map density, the ligand bound by the four side chains of C1-FDX\_H83, C1-FDX\_C91,  
339 C1-FDX\_C95 and C1-FDX\_C135 cannot be a 2Fe2S cluster, but must be a single metal ion,  
340 most likely iron. This would distinguish C1-FDX from all other mitochondrial ferredoxins of  
341 mammals, fungi and plants. In *Polytomella*, the C1-FDX equivalent NUOP3 lacks all four  
342 conserved cysteines. As a result, the core domain loop is locked in a state that cannot not  
343 bind a metal ion (Figure 4), and therefore the *Polytomella* ferredoxin is inactive.

344

345 What could be the functional role of the bridge domain of plant and algal complex I?  
346 Interestingly, homologs of B14, the SDAP protein and C1-FDX form a functional module  
347 within the ISC assembly machinery. Together with the cysteine desulfurase NFS1, the  
348 scaffold protein ISCU and frataxin, they can perform *de novo* FeS cluster biosynthesis  
349 (Boniecki et al., 2017; Cory et al., 2017; Fox et al., 2019; Lill, 2020). We conclude that  
350 elements of the ISC assembly machinery are part of complex I in algae and plants.  
351 Nevertheless, biosynthesis of complete FeS clusters on intact complex I is unlikely, because  
352 this would require the other components of the ISC assembly machinery to bind in positions  
353 where they would interfere with the peripheral arm (Supp. Fig. 24). However, it is possible  
354 that assembly intermediates of complex I lacking the peripheral arm bind the missing  
355 components of the ISC assembly machinery transiently and then catalyse the formation of  
356 FeS clusters. Presumably, our structure shows how these subunits interact within the ISC  
357 assembly machinery.

358

359

## 360 **2.4 Ferredoxin binding to plant mitochondrial complex I sets the angle between its two** 361 **arms**

362

363 The angle between the membrane and peripheral arms of mammalian complex I varies. Two  
364 states have been described, referred to as open (112° angle between the two arms) and  
365 closed (105°) (reviewed in (Parey et al., 2020)). Our analysis of *Arabidopsis* complex I likewise  
366 revealed two states that resemble those of the mammalian complex. About one third of the  
367 intact *Arabidopsis* particles are in the closed state, with an angle of 106° between the  
368 membrane and peripheral arms, whereas two thirds are in the open state, with an angle of  
369 112°. At 3.7 Å resolution, 3D maps calculated for these conformational classes reveal that  
370 complex I in the open state lacks the acyl carrier and C1-FDX subunits almost entirely (Figure  
371 5a,b,c). In the closed state, both subunits are present and well-defined. Our data suggest  
372 that the binding of the acyl carrier and C1-FDX subunits to *Arabidopsis* complex I sets the

373 angle between its two arms. In the more robust *Polytomella* complex I, a helix of one of its  
374 unidentified accessory subunits wraps around the lower part of the ferredoxin, holding it  
375 firmly in place and preventing its dissociation (Figure 4b; Sup. Fig. 16). This explains why the  
376 *Polytomella* complex is found exclusively in the closed conformation.

377

378 The transition from the open to the closed state in *Arabidopsis* complex I is associated with a  
379 conformational switch of the loop linking TM helices 5 and 6 of the core ND1 subunit in the  
380 membrane arm. The ND1 loop is in a well-defined “down” conformation in the closed state,  
381 while the upper part of TMH 5 near the matrix surface of the membrane arm is unfolded  
382 (Figure 5d). In the open state, the unfolded stretch folds into three turns of an alpha helix,  
383 extending TMH 5 towards the matrix, and the loop switches from the “down” to an “up”  
384 conformation. The same conformational switch of the ND1 loop has been reported for the  
385 ovine complex (Sup. Fig. 25b). In its catalytic cycle, complex I has been suggested to  
386 alternate between the open and closed state (Kampjut & Sazanov, 2020). Mammalian  
387 complex I can assume a number of different open conformations, one of which has been  
388 assigned to the deactive state (Kampjut & Sazanov, 2020). The deactive state of the ovine  
389 complex is arrested by TMH 4 of the core ND6 subunit, which tilts by ~35° to a new position  
390 on the outside of the membrane arm (Sup. Fig. 25e). In *Polytomella* (Sup. Fig. 16,  
391 unknown 5) and in both states of the *Arabidopsis* complex (Sup. Fig. 7), this position is  
392 occupied by the transmembrane helix of an unknown accessory subunit, and therefore  
393 deactivation of the plant complex must proceed by a different mechanism.

394

395 The transition between the deactive and active states of mammalian and *Yarrowia* complex I  
396 is accompanied by distinct conformational changes of several subunit loops (Agip et al.,  
397 2018; Grba & Hirst, 2020; Kampjut & Sazanov, 2020; Parey et al., 2019) near the Q reduction  
398 site (site 1) at the end of the Q channel and the so-called E channel, an aqueous cavity  
399 branching off the Q channel (Figure 5d). In both states of the *Arabidopsis* complex I, the  
400 native quinol substrate binds near the Q channel entrance (site 2) (Figure 5d). Apart from a  
401 major change in the ND1 loop (Figure 5d, Sup. Fig. 25a), detailed comparison of the closed  
402 and open states of the *Arabidopsis* complex revealed only minor changes in loop  
403 conformations. In both states, the 49 kDa loop is extended and blocks access to the Q  
404 reduction site (Figure 5d, Sup. Fig. 25c) and the PSST loop with its two Arg residues has the  
405 same conformation (Sup. Fig. 25d). In the closed state of the *Arabidopsis* complex, the E  
406 channel is blocked by Tyr216 in the ND1 loop in the “down” position (Figure 5d, Sup. Fig.  
407 25a). In the open state of the *Arabidopsis* complex, the ND1 loop is in the “up” position and  
408 the E channel is clear. Both the ND1 loop and the 49 kDa loop are in the same respective  
409 conformations in the open states of the ovine and *Arabidopsis* complex (Sup. Fig. 25a,c).  
410 Notwithstanding their remarkable similarity, clear differences exist between the *Arabidopsis*  
411 and ovine complex I in the loop conformations that control access to the Q reduction site  
412 and E channel. These differences most likely reflect the occupation of the Q reduction site by  
413 quinol substrate or an inhibitor.

414

415

416

## 417 **CONCLUSION**

418

419 The structures of mitochondrial complex I from *Arabidopsis* and *Polytomella* show that the  
420 heterotrimeric  $\gamma$ CA domain is attached to the membrane arm by the coiled-coil amphipathic  
421 helices of the two  $\gamma$ CA subunits. Only one of the three potential active sites of the  $\gamma$ CA  
422 domain binds a metal ion in *Arabidopsis*, whereas none of them do in *Polytomella*. The  $\gamma$ CA  
423 domain has been suggested to promote transfer of mitochondrial CO<sub>2</sub> for carbon fixation by  
424 the Calvin-Benson cycle to the chloroplasts. The  $\gamma$ CA domain is known to be essential for  
425 plant mitochondrial complex I assembly, but its connection to the bridge domain suggests an  
426 additional role in controlling the mutual orientation of the two complex I arms, and possibly  
427 their activity.

428

429 Of the three accessory subunits in the bridge domain, the peripheral arm protein B14 and  
430 the acyl carrier protein SDAP2 are conserved in mammals and *Yarrowia*. In the plant  
431 complex, the bridge it is completed by the special ferredoxin C1-FDX that appears to  
432 coordinate an iron ion instead of the usual FeS cluster. In the bridge, C1-FDX fills the gap  
433 between the acyl carrier protein and the core subunit ND2 in the membrane arm close to  
434 the  $\gamma$ CAL subunit of the carbonic anhydrase domain. The three-subunit protein bridge seems  
435 to control the angle between the two complex I arms in the open and closed state (Figure 6).  
436 We assume that the active form of *Arabidopsis* complex I would be in a closed state, as it  
437 corresponds to the active state of mammalian complex I and the closed state of the ovine  
438 complex in the catalytic cycle (Kampjut & Sazanov, 2020). It is tempting to speculate that C1-  
439 FDX is involved in the regulation of complex I activity, either by dynamic interaction of the  
440 ferredoxin with the fully assembled complex, or by its incorporation in a final step of the  
441 assembly pathway. We expect that a similar ferredoxin bridge links the acyl carrier subunit  
442 to ND2 in mammals, but that this bridge is less stable and therefore breaks or dissociates  
443 upon isolation. Regulation by C1-FDX may depend on the oxidation state of the bound metal  
444 ion, which might act as a sensor to align complex I activity with the redox state of the  
445 mitochondrial matrix. Such a mechanism might be of special significance for photosynthetic  
446 organisms.

447

448

449

450

451 Author contributions

452

453 HPB and WK initiated the project. NK purified complex I from *Polytomella*, NK and JS purified  
454 complex I from *Arabidopsis*. NK collected cryoEM data, performed image processing and  
455 produced the figures. NK and ÖY built and analyzed the atomic models. JS carried out  
456 proteome analyses. All authors evaluated data. HPB and WK wrote the manuscript, with  
457 contributions from NK and JS.

458

459

460 Acknowledgements

461

462 We thank Janet Vonck and Volker Zickermann for critical comments on the manuscript. The  
463 work was funded by the Max Planck Society (WK, ÖY, NK) and by the Deutsche  
464 Forschungsgemeinschaft (grant BR 1829/10-2 – HPB, JS; SFB 807 – WK, NK).

465

466 Complex I subunits of *Arabidopsis*

469 Complex I subunits of *Polytomella*

| peripheral arm and bridge domain |                              |                                   |
|----------------------------------|------------------------------|-----------------------------------|
| core subunits                    | conserved accessory subunits | plant specific accessory subunits |
| <b>7</b>                         | <b>7</b>                     | <b>1</b>                          |
| 24 kDa                           | 13 kDa                       | C1-FDX                            |
| 51 kDa                           | 18 kDa                       |                                   |
| 75 kDa                           | 39 kDa                       |                                   |
| TYKY-1                           | B8                           |                                   |
| PSST                             | B13                          |                                   |
| ND7                              | B14.5a                       |                                   |
| ND9                              | B17.2                        |                                   |

| peripheral arm and bridge domain |                              |                                   |
|----------------------------------|------------------------------|-----------------------------------|
| core subunits                    | conserved accessory subunits | plant specific accessory subunits |
| <b>7</b>                         | <b>7</b>                     | <b>1</b>                          |
| 24 kDa                           | 13 kDa                       | C1-FDX (NUOP3)                    |
| 51 kDa                           | 18 kDa                       |                                   |
| 75 kDa                           | 39 kDa                       |                                   |
| TYKY                             | B8                           |                                   |
| PSST                             | B13                          |                                   |
| ND7                              | B14.5a                       |                                   |
| ND9                              | B17.2                        |                                   |

| membrane arm and $\gamma$ CA domain |                              |                                   |
|-------------------------------------|------------------------------|-----------------------------------|
| core subunits                       | conserved accessory subunits | plant-specific accessory subunits |
| <b>7</b>                            | <b>19</b>                    | <b>6</b>                          |
| ND1                                 | 15 kDa-1/2                   | CA1/CA3                           |
| ND2                                 | AGGG                         | CA2                               |
| ND3                                 | ASHI                         | CAL2/CAL1                         |
| ND4                                 | B9                           | P1                                |
| ND4L                                | B12-2                        | P2                                |
| ND5                                 | B14                          | unknown su                        |
| ND6                                 | B14.5b                       |                                   |
|                                     | B14.7                        |                                   |
|                                     | B15                          |                                   |
|                                     | B16.6-2                      |                                   |
|                                     | B18                          |                                   |
|                                     | B22                          |                                   |
|                                     | ESSS-1                       |                                   |
|                                     | KYFI                         |                                   |
|                                     | MNLL                         |                                   |
|                                     | MWFE                         |                                   |
|                                     | PDSW-1                       |                                   |
|                                     | PGIV-2                       |                                   |
|                                     | SDAP-1                       |                                   |
|                                     | SDAP-2                       |                                   |

| membrane arm and $\gamma$ CA domain |                              |                                   |
|-------------------------------------|------------------------------|-----------------------------------|
| core subunits                       | conserved accessory subunits | plant-specific accessory subunits |
| <b>7</b>                            | <b>20</b>                    | <b>4</b>                          |
| ND1                                 | 15 kDa                       | CA1/CA3                           |
| ND2                                 | AGGG                         | CA2                               |
| ND3                                 | ASHI                         | CAL                               |
| ND4                                 | B9                           | NUOP4                             |
| ND4L                                | B12                          | NUOP5                             |
| ND5                                 | B14                          | unknown su                        |
| ND6                                 | B14.5b                       |                                   |
|                                     | B14.7                        |                                   |
|                                     | B15                          |                                   |
|                                     | B16.6                        |                                   |
|                                     | B18                          |                                   |
|                                     | B22                          |                                   |
|                                     | ESSS                         |                                   |
|                                     | KYFI                         |                                   |
|                                     | MNLL                         |                                   |
|                                     | MWFE                         |                                   |
|                                     | PDSW                         |                                   |
|                                     | PGIV                         |                                   |
|                                     | SDAP-1                       |                                   |
|                                     | SDAP-2                       |                                   |

467  
468

470 **Table 1** Complex I subunits of *Arabidopsis* and *Polytomella* in the structures shown in **Figures 1 and**  
471 **2**. Red, total number of subunits in the subcomplexes. Grey, subunits detected by MS not identified  
472 in the cryoEM maps. Extensions - 1/-2 indicate isoforms for some *Arabidopsis* complex I subunits. The  
473 dominant isoform was fitted to the map. For protein accession numbers, see Sup. Table 1.



474  
475

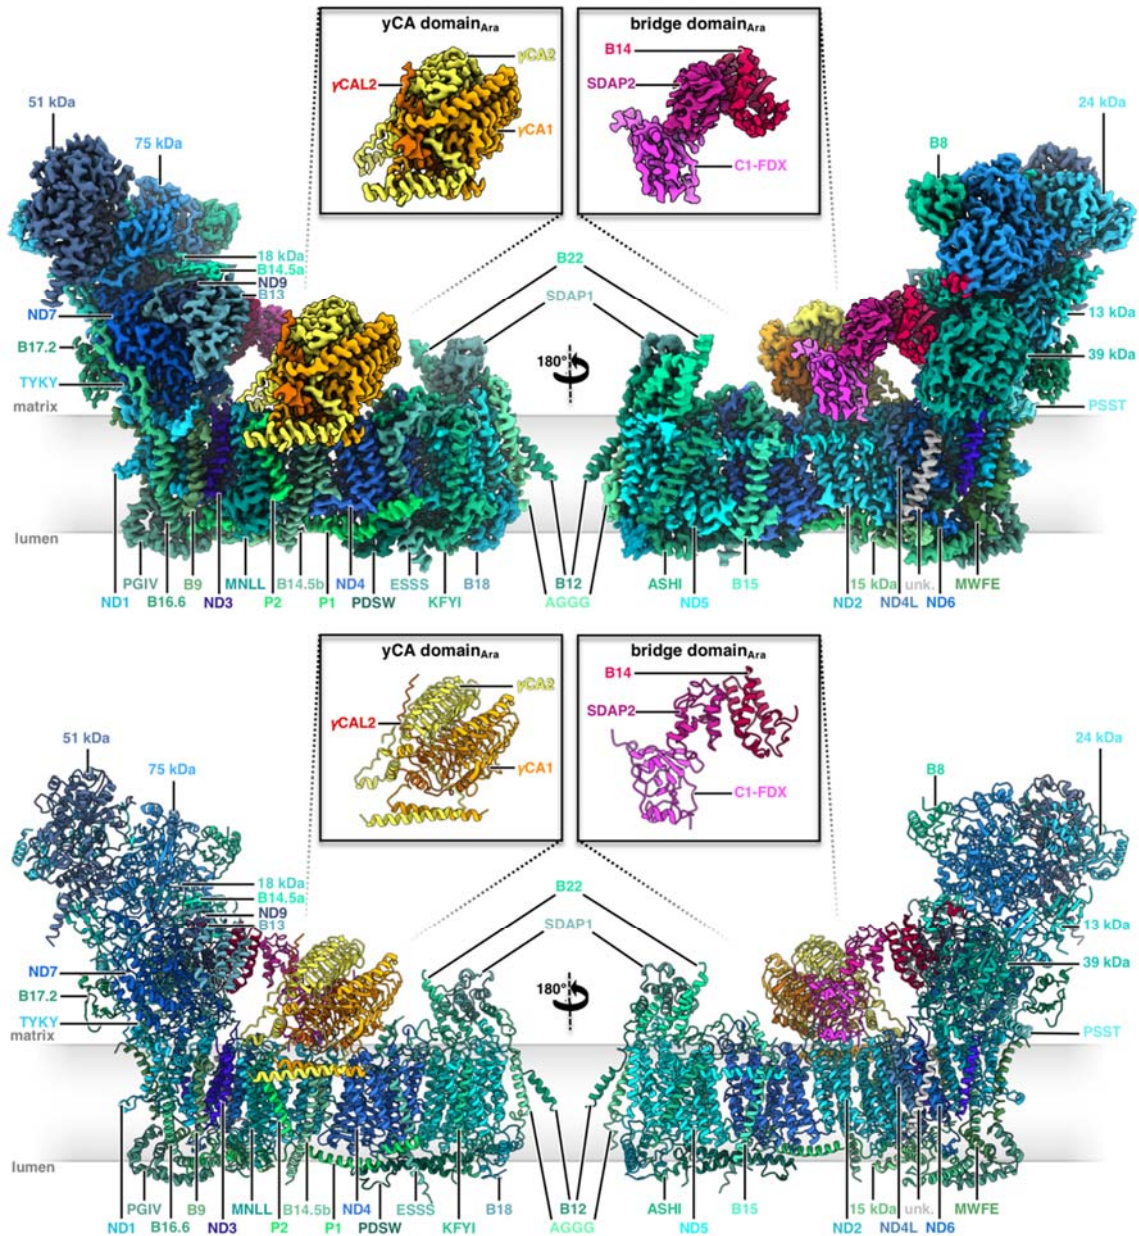

476  
477

478

479 **Figure 1** Structure of mitochondrial complex I from *Arabidopsis*. Above: Cryo-EM density; below:  
480 atomic model. The 14 core subunits conserved in complex I in bacteria and eukaryotes are drawn in  
481 shades of blue; the accessory subunits in shades of green; the three subunits of the carbonic  
482 anhydrase domain are yellow, light orange and orange; subunits of the bridge domain are pink,  
483 purple and red. Subunit nomenclature as for bovine complex I (Walker et al., 1992). Unknown (unk)  
484 refers to one subunit in the membrane arm that was not assigned due to limited amino acid  
485 sequence information. Figure insets:  $\gamma$ -carbonic anhydrase ( $\gamma$ CA) and bridge domains. For EM  
486 statistics see Supp. tables 2, 4 and 6.

487



488

489

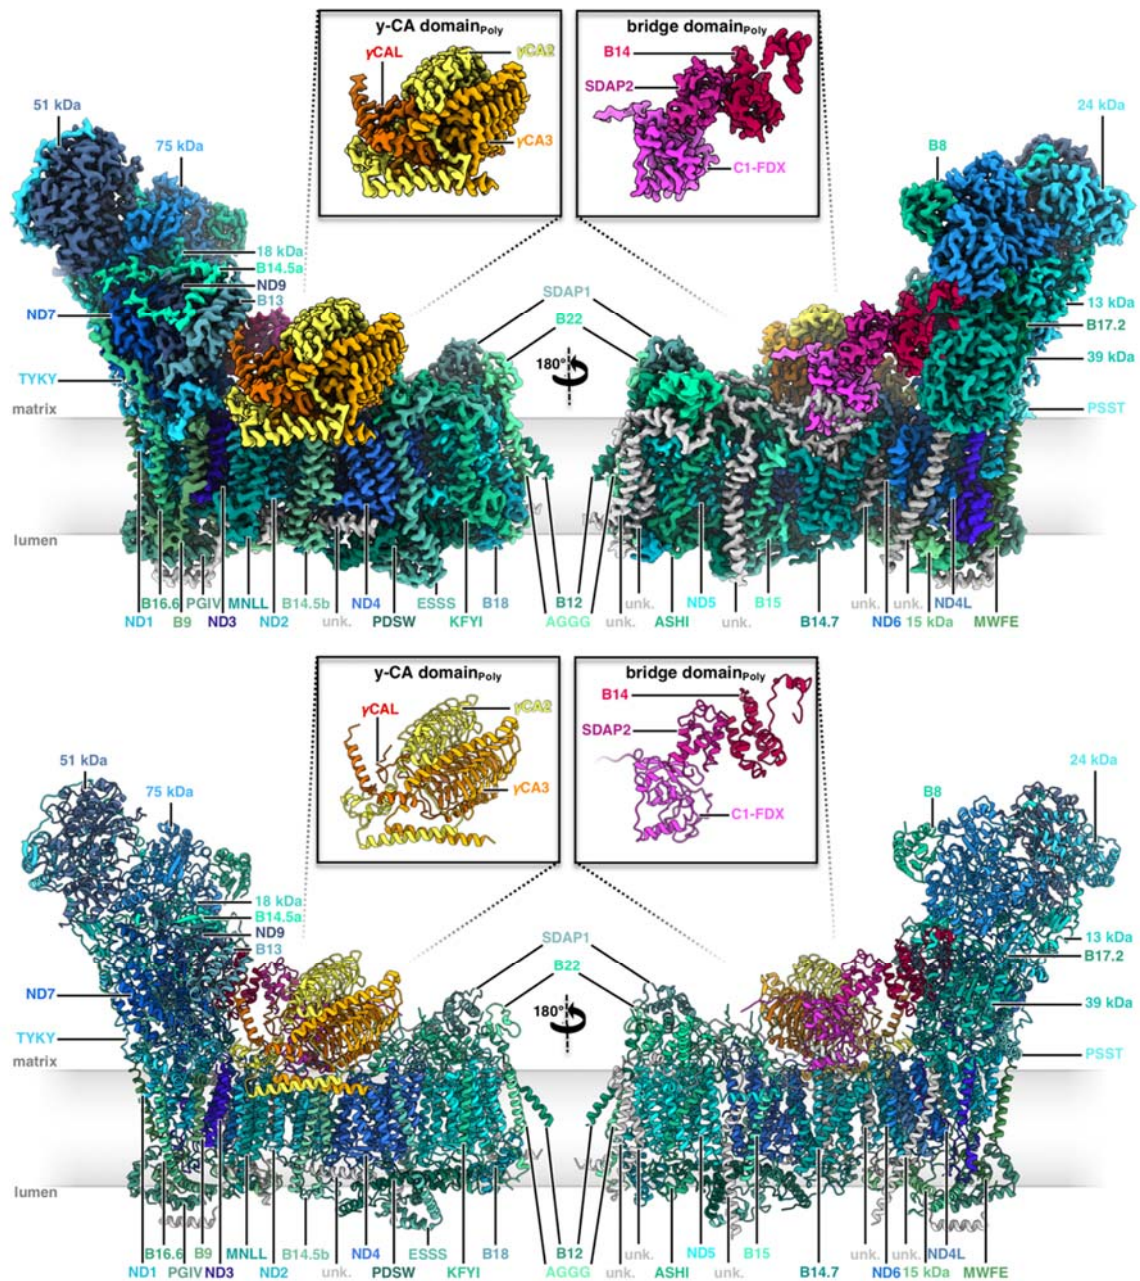

490

491

492 **Figure 2** Structure of mitochondrial complex I from *Polytomella* sp. Above: Cryo-EM density; below:  
493 atomic model. Color scheme for the 14 conserved core subunits, accessory subunits and the subunits  
494 of the carbonic anhydrase and bridge domains as in Figure 1. Insets: y-carbonic anhydrase ( $\gamma$ CA) and  
495 bridge domains. Unknown (unk) refers to six unassigned densities in the membrane arm with limited  
496 amino acid sequence information. For EM statistics see Supp. tables 3, 5 and 7.

497

498

499

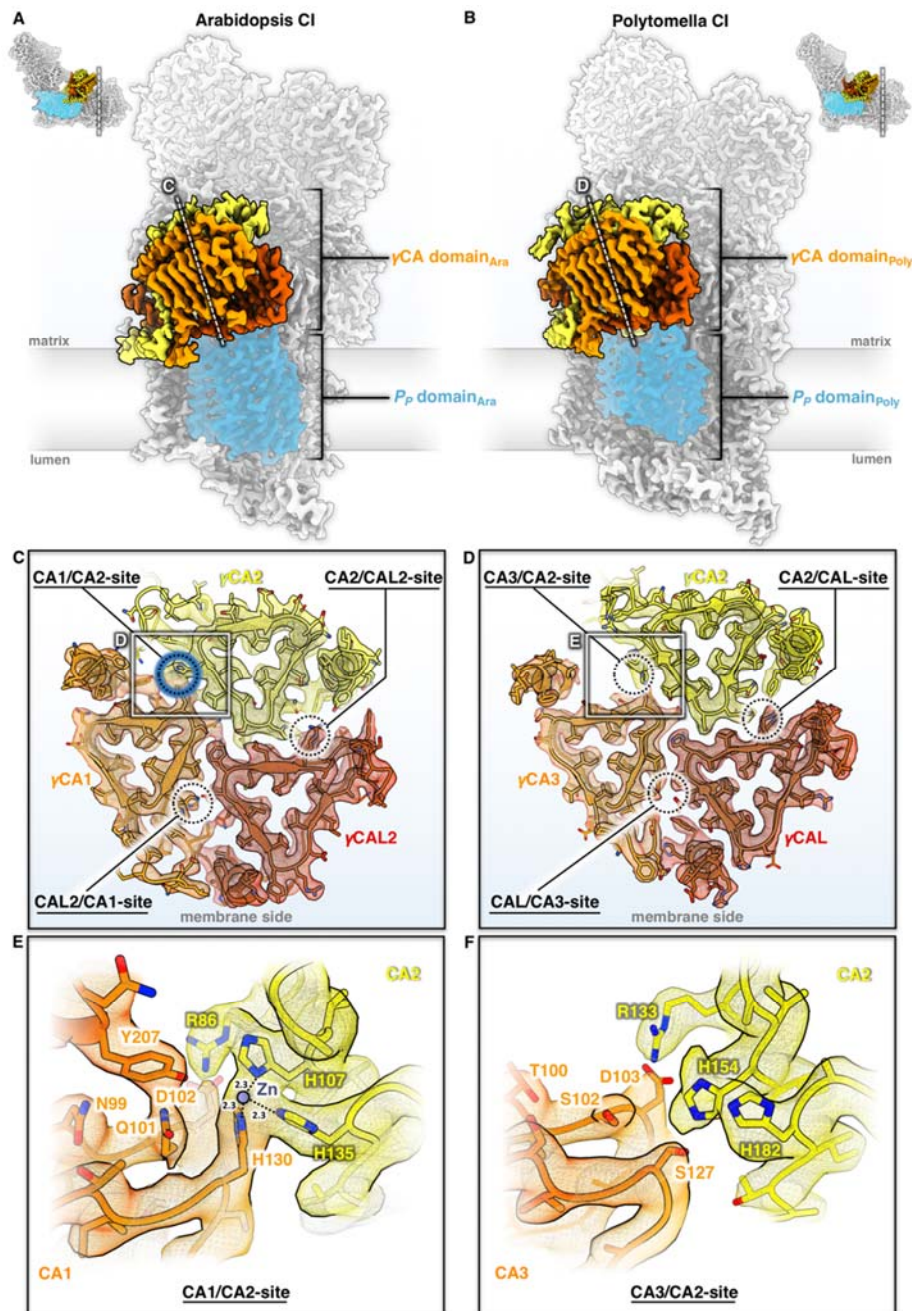

500

501 **Figure 3** The  $\gamma$ CA domain of *Arabidopsis* and *Polytomella* mitochondrial complex I. **A, B:** Position of  
 502 the  $\gamma$ CA domain on the membrane arm. Complex I (CI) is seen from the tip of the membrane arm and  
 503 cut at the plane indicated by a dashed white line in the small insets. Subunit color scheme as in  
 504 **Figures 1 and 2**. The  $P_P$  domain of the membrane arm is shaded blue. **C, D:** Cross-sections of the  $\gamma$ CA  
 505 domains of *Arabidopsis* (C) and *Polytomella* (D) at the level of the catalytic sites at the  $\gamma$ CA/CAL  
 506 subunit interfaces, as indicated by dashed circles. In *Arabidopsis*, one of the three possible catalytic  
 507 sites coordinates a metal (presumably zinc) ion (blue) and is therefore potentially active, whereas  
 508 none of the three sites of the *Polytomella*  $\gamma$ CA domain are occupied, and therefore they are inactive.  
 509 **E, F:** Details of catalytic site regions in *Arabidopsis* (E) and *Polytomella* (F) (white boxes in C and D).  
 510 Amino acids are indicated by the one-letter code. For further details, see **Sup. Figures 18-21**.  
 511



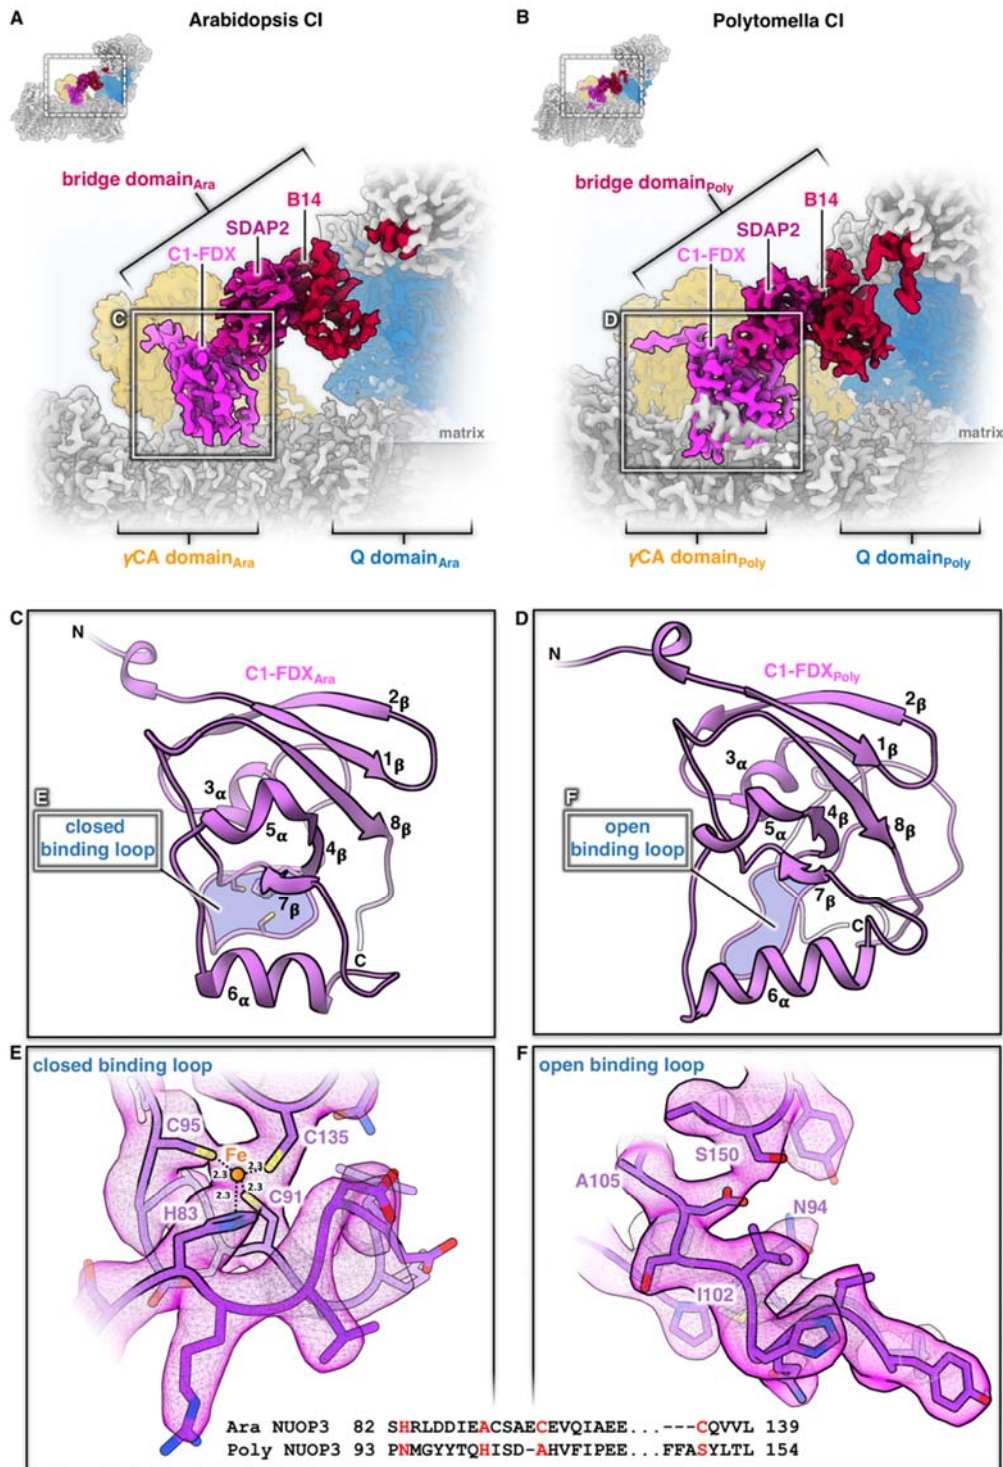

512  
 513 **Figure 4** The bridge domain of *Arabidopsis* and *Polytomella* complex I (CI). **A, B:** Attachment of the  
 514 bridge domain linking the membrane arm near the  $\gamma$ CA domain (orange) to the Q domain of the  
 515 peripheral arm (blue). **C, D:** Structure of the C1-FDX subunit in *Arabidopsis* and *Polytomella*. **E, F:**  
 516 catalytic sites of C1-FDX in *Arabidopsis* and *Polytomella*. For details, see [Sup. Figs. 16 and 22-24](#).

517

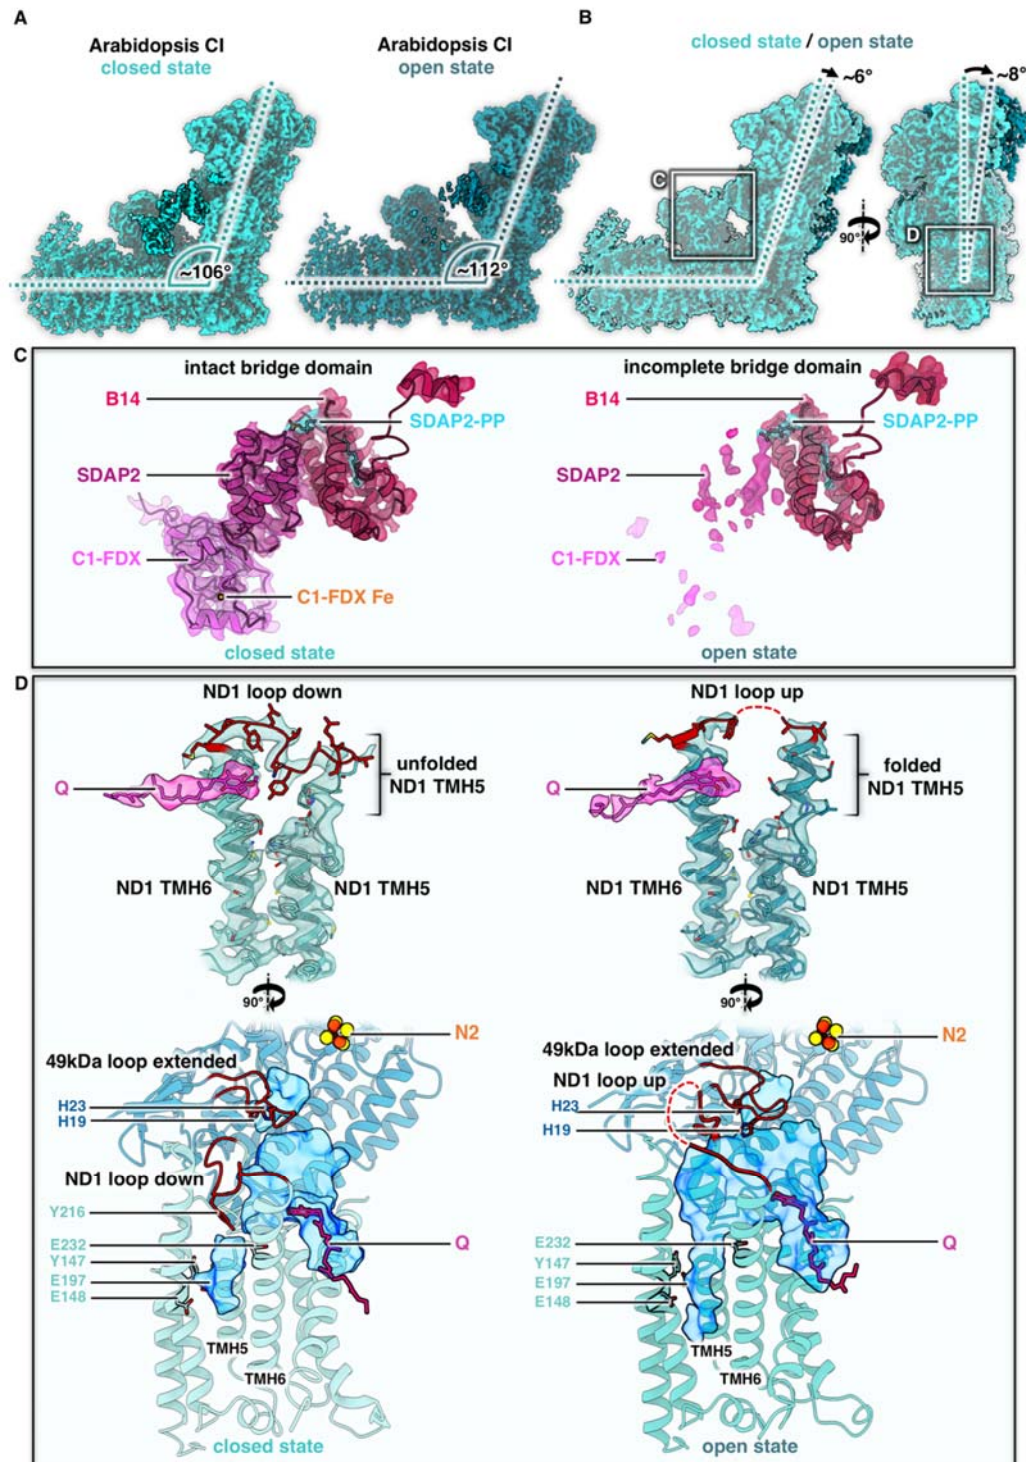

518

519 **Figure 5** Conformations of *Arabidopsis* complex I (CI). **A:** closed (angle  $106^\circ$ ) and open ( $112^\circ$ )  
 520 conformation. **B:** Front and side views of superposed maps shown in A. **C:** Map density and fitted  
 521 atomic models of the bridge domain in *Arabidopsis*. Subunits color scheme as in Figures 1 and 2. **D:**  
 522 Conformation of the Q-binding site in the open and closed complex I conformations. Top: orientation  
 523 of the loop between transmembrane helix (TMH) 5 and TMH6 in ND1. Below: Q-binding channel  
 524 (blue) with E channel on the left, indicating different conformations of the ND1 and 49 kDa loops  
 525 with conserved amino acids drawn as sticks. For details, see Supp. Figure 25.

526

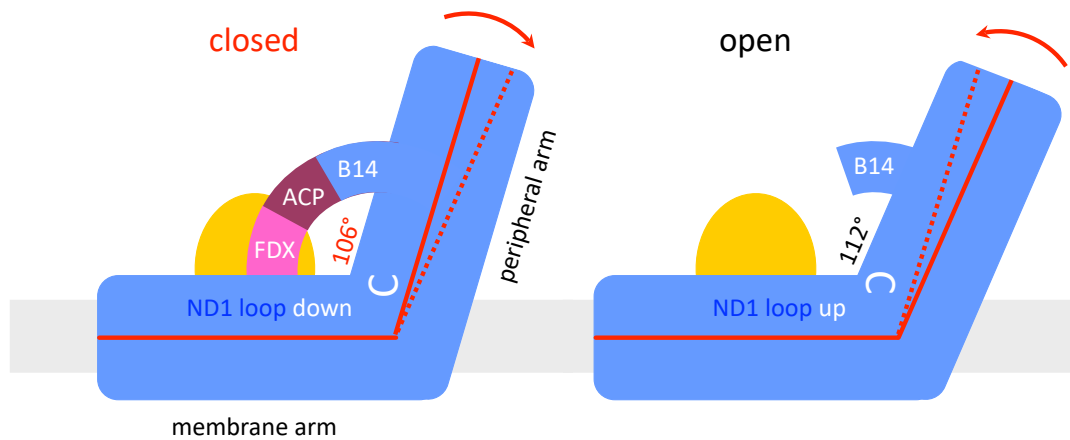

527

528

529

530

531

532

533

534

535

**Figure 6:** The ferredoxin bridge of *Arabidopsis* complex I. In the closed state, subunit B14 of the peripheral arm forms a bridge with the acyl carrier protein SDAP2 (purple) and the complex I ferredoxin C1-FDX (pink). Ferredoxin joins the bridge to the membrane arm near the gamma carbonic anhydrase domain (orange). The ND1 loop linking TMH5 and 6 of the ND1 subunit in the membrane arm (white) is down. The bridge sets the angle between the membrane and peripheral arms to 106°. In the open state, the ND1 loop flips to the “up” position, the acyl carrier protein and ferredoxin dissociate, and the angle relaxes to 112°. Membrane, grey. The position of the gamma carbonic anhydrase domain is taken by a 42 kDa nucleoside kinase in mammalian complex I.

536

537

538 **Materials and Methods**

539

540 **Plant material**

541 *Arabidopsis thaliana* was cultivated as described (Farhat et al., 2019). In short, *Arabidopsis* plants  
542 (ecotype Columbia 0) were grown under sterile conditions in a growth chamber (16h light / 8h dark,  
543 22°C) for one week. Leaves were cut into small pieces and placed on B5 medium (3.16 g/l B5-  
544 medium, 3% sucrose [w/v], 0.75% agar [w/v], 0.5 mg/l 2,4-D, 0.05 mg/l kinetin, pH5.7) to induce  
545 callus formation. After three weeks, callus tissue was transferred into liquid B5 medium, which was  
546 refreshed once per week. The cell suspension culture was maintained at 22°C on a shaker in the dark.  
547 *Polytomella* sp. cells (198.80, E.G. Pringsheim) were ordered from the SAG Culture Collection of Algae  
548 (Göttingen University, Germany) and cultivated in acetate medium (0.2% [w/v] sodium acetate, 0.1%  
549 [w/v] tryptone peptone, 0.1% [w/v] yeast extract) at 20°C in the dark. The medium was changed  
550 twice per week.

551

552 ***Arabidopsis thaliana* mitochondria isolation**

553 Mitochondria were isolated from ~150 g of cells from *A. thaliana* cell suspension cultures. Cells were  
554 harvested with a sieve. All following steps were performed at 4°C or on ice. Cells were disrupted in  
555 grinding buffer (450 mM sucrose, 15 mM MOPS, 1.5 mM EGTA, 0.6% [w/v] PVP40, 0.2% (w/v) BSA,  
556 10 mM sodium ascorbate, 10 mM cysteine, pH7.4, 0.2 mM PMSF) using a Waring blender. The  
557 suspension was centrifuged at 2,700 xg (twice) and 8,300 xg for 5 minutes to remove cell debris.  
558 Mitochondria were pelleted by centrifugation at 17,000 xg for 10 minutes, resuspended in washing  
559 buffer (300 mM sucrose, 10 mM MOPS, 1 mM EGTA, pH7.2, 0.2 mM PMSF) and carefully dispersed  
560 using a Dounce homogenizer. Isolated mitochondria were loaded onto discontinuous Percoll  
561 gradients (18%, 23% and 40% Percoll in gradient buffer [300 mM sucrose, 10 mM MOPS, pH7.2]).  
562 Percoll gradient ultracentrifugation was performed at 70,000 xg for 90 minutes. Mitochondria were  
563 collected from the 18%-23% interphase of the Percoll gradients. Percoll was removed by three cycles  
564 of pelleting the mitochondria by centrifugation at 14,500 xg for 10 minutes and resuspending the  
565 pellets in resuspension buffer (400 mM mannitol, 1 mM EGTA, 10 mM tricine, pH7.2, 0.2 mM PMSF).  
566 Washed mitochondrial pellets were finally resuspended at a concentration of 0.1 g organelle pellet  
567 per ml resuspension buffer and stored at - 80°C until further use.

568

569 **Purification of complex I from *Arabidopsis thaliana***

570 Purified mitochondria from *Arabidopsis thaliana* (corresponding to about 60 mg mitochondrial  
571 pellet) were sedimented by centrifugation at 14,300 xg for 10 minutes at 4°C, resuspended in  
572 membrane solubilization buffer (30 mM HEPES, 150 mM potassium acetate, 1% [w/v] lauryl maltose  
573 neopentyl glycol [LMNG]) and incubated for 5 minutes on ice. Solubilized protein complexes were  
574 separated from membrane debris by centrifugation for 20 minutes at 18,300 g and 4°C.  
575 Mitochondrial protein complexes were separated by sucrose gradient ultracentrifugation (Klodmann  
576 et al., 2010), modified). Sucrose gradients (volume: 15 ml) were prepared by a gradient mixer using 8  
577 and 7 ml of a 1.5 M and 3 M sucrose solution (in 15 mM Tris, 20 mM KCl, 0.05 % [w/v] LMNG, pH  
578 7.0), respectively. One mg mitochondrial protein was loaded per gradient. Centrifugation was at  
579 146,000 xg and 4°C for 20h. Gradients were fractionated into aliquots of 500µl using a sample  
580 collector. To identify fractions containing complex I, 50 µl aliquots were analyzed by one-dimensional  
581 Blue-native PAGE (Wittig et al., 2006). Complex I was further purified by size-exclusion  
582 chromatography. Fractions containing complex I were pooled and loaded onto a Superose 6 Increase



583 10/300 column (GE Healthcare) equilibrated with buffer containing 30 mM HEPES-NaOH, pH 7.8, 50  
584 mM KCl and 0.007% (w/v) LMNG. Fractions containing complex I were concentrated using a Vivaspinn  
585 500 column with a 100,000 molecular weight cutoff. To remove sucrose, the concentrated sample  
586 was resuspended in size exclusion buffer and finally concentrated to a protein concentration of  
587 1.1 mg/ml which was used directly for cryo-EM specimen preparation.

588

#### 589 **Purification of complex I from *Polytomella* sp.**

590 *Polytomella* sp. mitochondrial complex I was purified following the protocol for the preparation of  
591 *Polytomella* ATP synthase (Murphy et al., 2019) with modifications. Mitochondria (175mg  
592 mitochondrial protein) harvested from a *Polytomella* culture in exponential growth phase were  
593 solubilized for 30 min at 4°C in a total volume of 12 ml buffer containing 30 mM Tris-HCl, pH 7.8, 50  
594 mM NaCl, 2 mM MgCl<sub>2</sub> and 2.9% (w/v) lauryl maltose neopentyl glycol (LMNG) to a final  
595 detergent:protein weight ratio of 2:1. Unsolubilized material was removed by centrifugation at  
596 21,000g for 15 min at 4°. The supernatant was filtered and loaded onto a POROS GoPure HQ column  
597 (Thermo Fisher Scientific) connected to an Äkta purifier (GE Healthcare). The column was  
598 equilibrated in buffer A (30 mM Tris-HCl, pH 7.8, 50 mM NaCl, 2 mM MgCl<sub>2</sub>, 0.0085% (w/v) LMNG).  
599 After an initial wash with 100 mM NaCl in buffer A, complex I was eluted with a linear 100-300 mM  
600 NaCl gradient in buffer A. Fractions containing complex I were concentrated using an Amicon Ultra 4  
601 column with 100,000 molecular weight cutoff and loaded onto a Superose 6 Increase 3.2/30 size  
602 exclusion column (GE Healthcare). Complex I was eluted in buffer B (30 mM Tris-HCl, pH 7.4, 60 mM  
603 NaCl, 0.007% LMNG) and used directly for cryo-EM specimen preparation.

604

#### 605 **Analysis of the subunit composition of *Polytomella* complex I by two-dimensional SDS/SDS** 606 **polyacrylamide gel electrophoresis**

607 2D SDS/SDS polyacrylamide gel electrophoresis (PAGE) of *Polytomella* complex I was carried out as  
608 described (Rais et al., 2004). Briefly, purified complex I from *Polytomella* sp. was mixed 1:1 with SDS  
609 sample buffer (10% [w/v] SDS, 30% glycerol [v/v], 100 mM Tris, 4% mercaptoethanol, 0.006%  
610 bromophenolblue, pH6.8) and loaded onto a 10% polyacrylamide SDS gel containing 6M urea. After  
611 first dimension SDS PAGE, a gel lane with separated subunits of complex I was excised, washed in  
612 acidic solution (100 mM Tris, 150 mM HCl, pH2.0) and transferred horizontally onto a second  
613 dimension SDS gel (16% polyacrylamide, without urea). 2D gels were stained with Coomassie blue  
614 (Neuhoff et al., 1985).

615

#### 616 **Protein analyses by mass spectrometry (MS)**

617 Protein spots were excised from 2D SDS/SDS gels. Proteins were fragmented into peptides by tryptic  
618 in-gel digestion as described (Klodmann et al., 2010). Tryptic peptide mixtures were finally analyzed  
619 by coupled liquid chromatography (LC) / electrospray (ESI)- quadrupole (Q)- time of flight (ToF) mass  
620 spectrometry (MS) using the Easy nLC system (Thermo Scientific, Dreieich, Germany) and a  
621 micrOTOF Q II mass spectrometer (Bruker Daltonics, Bremen, Germany). Tryptic peptides were  
622 extracted (for details see (Klodmann et al., 2010)), resolved in solution P (0.1% formic acid, 2%  
623 acetonitrile in water) and transferred into the LC sample table. For peptide separation, a 2 cm C18  
624 pre-column (ID 75µm, particle size 5µm, Thermo Scientific) and a 10 cm C18 analytical column (ID  
625 75µm, particle size 3µm, Thermo Scientific) were used. A discontinuous elution gradient was applied  
626 by mixing solution A (0.1% formic acid in water) and solution B (0.1% formic acid in acetonitrile) as

627 described (Klodmann et al., 2011). MS/MS parameters were applied as outlined before (Klodmann et  
628 al., 2011).

629

### 630 **Evaluation of MS data**

631 For protein identification, the following databases were searched with an in-house Mascot server: (i)  
632 a modified *Arabidopsis thaliana* protein database, based on the TAIR database  
633 [[www.arabidopsis.org](http://www.arabidopsis.org)] complemented with the edited sequences of mitochondrially encoded  
634 *Arabidopsis* proteins, (ii) a *Chlamydomonas reinhardtii* database and (iii) a *Polytomella* database  
635 (both downloaded from NCBI in 10/2019). In addition, a *Polytomella* protein database translated  
636 from genomic DNA was used (Murphy et al., 2019). Finally, a database integrating all sequences of  
637 complex I subunits from all databases was built and used to evaluate MS data.

638

### 639 **Shotgun mass spectrometry**

640 For shotgun mass spectrometry, 50 mg purified *Polytomella* complex I was prepared by SDS PAGE  
641 and tryptic in-gel digestion as described (Thal et al., 2018). Extracted peptides were measured with  
642 an U3000 UPLC (Thermo Scientific, Dreieich, Germany) coupled to a Q Exactive Orbitrap MS system  
643 (Thermo Scientific, Dreieich, Germany) following a standard shotgun MS protocol (Thal et al., 2018).

644

### 645 **Reference map for 2D-separated subunits of *Polytomella* complex I**

646 A reference map of a 2D SDS/SDS gel of *Polytomella* complex I was established at the GelMap  
647 platform ([www.gelmap.de](http://www.gelmap.de)) as described (Peters et al., 2013). The map (<https://gelmap.de/2062>)  
648 (password: Poly-C1) summarizes all MS-based identifications of complex I subunits from *Polytomella*.

649

### 650 **Electron cryo-microscopy and image processing of *A. thaliana* complex I**

651 A solution of 1.1 mg/ml purified complex I was applied onto C-flat 1.2/1.3 400 mesh copper grids  
652 (Science Services GmbH) that were glow-discharged for 45 s at 0.15 mA. Grids were frozen in liquid  
653 ethane after blotting for 4-7 s at blotforce 20 using a Vitrobot operating at 10°C and 70% humidity.  
654 Electron micrographs were collected at 300 kV in a Titan Krios G3i electron microscope equipped  
655 with a K3 detector operating in electron counting mode. The nominal magnification was 105,000x,  
656 giving a pixel size of 0.837 Å. 50-frame movies were recorded automatically with EPU software at an  
657 exposure rate of 15 e-pixel-1s-1. Particles were picked using crYOLO, motion-corrected with  
658 MotionCor2, and the CTF was estimated with CTFFind4.1.13. Further processing was performed in  
659 Relion3. For initial 3D classification to clean the dataset, particles were binned to a pixel size of 2.511  
660 Å. After 3D refinement with C1 symmetry applied to the whole complex, particles were re-extracted  
661 at a pixel size of 0.837 Å. Two additional rounds of CTF refinement and an intermediate step of  
662 Bayesian polishing resulted in a 3D reconstruction with an overall resolution of 3.41 Å. Further  
663 multibody refinement with a soft mask around the peripheral arm, the PP domain with the CA and  
664 bridge domain, or the PD domain resulted in final resolutions of 3.21 Å, 3.39 Å or 3.43 Å,  
665 respectively. To separate the closed and open conformations, particles were aligned to the  
666 peripheral arm with a local mask applied during 3D refinement, and then 3D-classified with a soft  
667 mask applied to the membrane arm with a value of T=20 and without particle alignment. Particle  
668 classes were further refined with a global mask, resulting in a resolution of 3.77 Å for the closed state  
669 and 3.72 Å for the open state. Final focussed 3D refinement around the PP, CA, bridge and Q domain  
670 improved the resolution to 3.72 Å and 3.69 Å.

671

672 **Electron cryo-microscopy and image processing of *Polytomella* sp. complex I**

673 A solution of complex I at a final concentration of 1.3 mg/ was applied onto glow-discharged (0.15  
674 mA for 45 s) C-flat 1.2/1.3 400 mesh copper grids (Science Services GmbH) and frozen in liquid  
675 ethane with a Vitrobot operating at 10°C and 70% with blotforce 20 (6 s blotting time). Electron  
676 micrographs were collected at 300 kV with a Titan Krios G3i equipped with a K3 detector in electron  
677 counting mode. 50-frame movies were recorded automatically at a pixel size of 0.837 Å and an  
678 exposure rate of 15 e<sup>-</sup>pixel<sup>-1</sup>s<sup>-1</sup> with EPU software. Movies were motion-corrected with MotionCor2  
679 and the CTF was estimated with CTFFind4.1.13. Particles were picked using crYOLO. Processing was  
680 performed in Relion3. For the first two rounds of 3D classification to clean the dataset, particles were  
681 binned to a pixel size of 2.511 Å. After 3D refinement with C1 symmetry applied to the whole  
682 complex, particles were re-extracted at a pixel size of 0.837 Å. The following 3D reconstruction  
683 resulted in an overall resolution of 3.53 Å. Additional multibody refinement with a soft mask around  
684 the peripheral and membrane arms resulted in final resolutions of 3.30 Å and 3.34 Å.

685

686 **Model building**

687 Initial models for the *A. thaliana* and *Polytomella* sp. complex I were built using homology models for  
688 each individual subunit created with the SWISS-MODEL server (Guex et al., 2009). Homology models  
689 were then rigid-body fitted into the cryo-EM density maps using UCSF Chimera (Pettersen et al.,  
690 2004), followed by manual building in Coot (Emsley et al., 2010). Final models were refined using the  
691 phenix.real\_space\_refine tool in Phenix (Afonine et al., 2018). Model quality statistics were taken  
692 from the phenix.validation\_cryoem tool and are summarized in table S3. For structural comparison,  
693 models were aligned using the Matchmaker tool of UCSF Chimera. Water-accessible cavities were  
694 simulated with the program Hollow (Ho & Gruswitz, 2008) using an interior probe radius of 1.4 Å and  
695 a surface probe of 3.5 Å. Figures were made using UCSF Chimera and ChimeraX (Goddard et al.,  
696 2018).

697

698

699

700

701

702

## Parsed Citations

- AFONINE, P. V., POON, B. K., READ, R. J., SOBOLEV, O. V., TERWILLIGER, T. C., URZHUMTSEV, A & ADAMS, P. D. (2018). Real-space refinement in PHENIX for cryo-EM and crystallography. *Acta Crystallographica Section D-Structural Biology*, 74, 531-544.  
Google Scholar: [Author Only](#) [Title Only](#) [Author and Title](#)
- AGIP, A. N. A., BLAZA, J. N., BRIDGES, H. R., VISCOMI, C., RAWSON, S., MUENCH, S. P. & HIRST, J. (2018). Cryo-EM structures of complex I from mouse heart mitochondria in two biochemically defined states. *Nature Structural & Molecular Biology*, 25(7), 548-+.  
Google Scholar: [Author Only](#) [Title Only](#) [Author and Title](#)
- AGIP, A. N. A., BLAZA, J. N., FEDOR, J. G. & HIRST, J. (2019). Mammalian Respiratory Complex I Through the Lens of Cryo-EM. *Annual Review of Biophysics*, Vol 48, 48, 165-184.  
Google Scholar: [Author Only](#) [Title Only](#) [Author and Title](#)
- ANGERER, H., RADERMACHER, M., MAŃKOWSKA, M., STEGER, M., ZWICKER, K., HEIDE, H., WITTIG, I., BRANDT, U. & ZICKERMANN, V. (2014). The LYR protein subunit NB4M/NDUFA6 of mitochondrial complex I anchors an acyl carrier protein and is essential for catalytic activity. *Proceedings of the National Academy of Sciences*, 111, 5207-5212.  
Google Scholar: [Author Only](#) [Title Only](#) [Author and Title](#)
- ANGERER, H., SCHONBORN, S., GORKA, J., BAHR, U., KARAS, M., WTTIG, I., HEIDLER, J., HOFFMANN, J., MORGNER, N. & ZICKERMANN, V. (2017). Acyl modification and binding of mitochondrial ACP to multiprotein complexes. *Biochim Biophys Acta Mol Cell Res*, 1864(10), 1913-1920.  
Google Scholar: [Author Only](#) [Title Only](#) [Author and Title](#)
- BARADARAN, R., BERRISFORD, J. M., MINHAS, G. S. & SAZANOV, L. A. (2013). Crystal structure of the entire respiratory complex I. *Nature*, 494, 443-448.  
Google Scholar: [Author Only](#) [Title Only](#) [Author and Title](#)
- BERRISFORD, J. M., BARADARAN, R. & SAZANOV, L. A. (2016). Structure of bacterial respiratory complex I. *Biochimica Et Biophysica Acta-Bioenergetics*, 1857(7), 892-901.  
Google Scholar: [Author Only](#) [Title Only](#) [Author and Title](#)
- BONIECKI, M. T., FREIBERT, S. A., MUHLENHOFF, U., LILL, R. & CYGLER, M. (2017). Structure and functional dynamics of the mitochondrial Fe/S cluster synthesis complex. *Nat Commun*, 8.  
Google Scholar: [Author Only](#) [Title Only](#) [Author and Title](#)
- BRAUN, H. P. (2020). The Oxidative Phosphorylation system of the mitochondria in plants. *Mitochondrion*, 53, 66-75.  
Google Scholar: [Author Only](#) [Title Only](#) [Author and Title](#)
- BRAUN, H. P. & ZABALETA, E. (2007). Carbonic anhydrase subunits of the mitochondrial NADH dehydrogenase complex (complex I) in plants. *Physiol Plant*, 129(1), 114-122.  
Google Scholar: [Author Only](#) [Title Only](#) [Author and Title](#)
- CAI, K., TONELLI, M., FREDERICK, R. O. & MARKLEY, J. L. (2017). Human Mitochondrial Ferredoxin 1 (FDX1) and Ferredoxin 2 (FDX2) Both Bind Cysteine Desulfurase and Donate Electrons for Iron Sulfur Cluster Biosynthesis. *Biochemistry*, 56(3), 487-499.  
Google Scholar: [Author Only](#) [Title Only](#) [Author and Title](#)
- CARDOL, P., BOUTAFFALA, L., MEMMI, S., DEVREESE, B., MATAGNE, R. F. & REMACLE, C. (2008). In *Chlamydomonas*, the loss of ND5 subunit prevents the assembly of whole mitochondrial complex I and leads to the formation of a low abundant 700 kDa subcomplex. *Biochimica Et Biophysica Acta-Bioenergetics*, 1777(4), 388-396.  
Google Scholar: [Author Only](#) [Title Only](#) [Author and Title](#)
- CARDOL, P., GONZALEZ-HALPHEN, D., REYES-PRIETO, A., BAURAIN, D., MATAGNE, R. F. & REMACLE, C. (2005). The mitochondrial oxidative phosphorylation proteome of *Chlamydomonas reinhardtii* deduced from the genome sequencing project. *Plant Physiology*, 137(2), 447-459.  
Google Scholar: [Author Only](#) [Title Only](#) [Author and Title](#)
- CARDOL, P., VANROBAEYS, F., DEVREESE, B., VAN BEEUMEN, J., MATAGNE, R. F. & REMACLE, C. (2004). Higher plant-like subunit composition of mitochondrial complex I from *Chlamydomonas reinhardtii*: 31 conserved components among eukaryotes. *Biochimica Et Biophysica Acta-Bioenergetics*, 1658(3), 212-224.  
Google Scholar: [Author Only](#) [Title Only](#) [Author and Title](#)
- CORY, S. A., VAN VRANKEN, J. G., BRIGNOLE, E. J., PATRA, S., WINGE, D. R., DRENNAN, C. L., RUTTER, J. & BARONDEAU, D. P. (2017). Structure of human Fe-S assembly subcomplex reveals unexpected cysteine desulfurase architecture and acyl-ACP-ISD11 interactions. *Proceedings of the National Academy of Sciences of the United States of America*, 114(27), E5325-E5334.  
Google Scholar: [Author Only](#) [Title Only](#) [Author and Title](#)
- D'IMPRIMA, E., MILLS, D. J., PAREY, K., BRANDT, U., KÜHLBRANDT, W., ZICKERMANN, V. & VONCK, J. (2016). Cryo-EM structure of respiratory complex I reveals a link to mitochondrial sulfur metabolism. *Biochim Biophys Acta*, 1857(12), 1935-1942.  
Google Scholar: [Author Only](#) [Title Only](#) [Author and Title](#)
- DUDKINA, N. V., EUBEL, H., KEEGSTRA, W., BOEKEMA, E. J. & BRAUN, H. P. (2005). Structure of a mitochondrial supercomplex

formed by respiratory-chain complexes I and III. *Proc. Natl. Acad. Sci. USA*, 102, 3225-3229.

Google Scholar: [Author Only](#) [Title Only](#) [Author and Title](#)

EMSLEY, P., LOHKAMP, B., SCOTT, W. G. & COWTAN, K. (2010). Features and development of Coot. *Acta Crystallogr D Biol Crystallogr*, 66(Pt 4), 486-501.

Google Scholar: [Author Only](#) [Title Only](#) [Author and Title](#)

EUBEL, H., JÄNSCH, L. & BRAUN, H. P. (2003). New insights into the respiratory chain of plant mitochondria. Supercomplexes and a unique composition of complex II. *Plant Physiol.*, 133, 274-286.

Google Scholar: [Author Only](#) [Title Only](#) [Author and Title](#)

FARHAT, N., HICHRI, S., HILDEBRANDT, T. M., DEBEZ, A. & BRAUN, H. P. (2019). Composition and Stability of the Oxidative Phosphorylation System in the Halophile Plant *Cakile maritima*. *Frontiers in Plant Science*, 10.

Google Scholar: [Author Only](#) [Title Only](#) [Author and Title](#)

FERRY, J. G. (2010). The gamma class of carbonic anhydrases. *Biochim Biophys Acta*, 1804(2), 374-381.

Google Scholar: [Author Only](#) [Title Only](#) [Author and Title](#)

FIEDORCZUK, K., LETTS, J. A., DEGLIESPOSTI, G., KASZUBA, K., SKEHEL, M. & SAZANOV, L. A. (2016). Atomic structure of the entire mammalian mitochondrial complex I. *Nature*, 538(7625), 406-410.

Google Scholar: [Author Only](#) [Title Only](#) [Author and Title](#)

FOX, N. G., YU, X. D., FENG, X. D., BAILEY, H. J., MARTELLI, A., NABHAN, J. F., STRAIN-DAMERELL, C., BULAWA, C., YUE, W. W. & HAN, S. (2019). Structure of the human frataxin-bound iron-sulfur cluster assembly complex provides insight into its activation mechanism. *Nat Commun*, 10.

Google Scholar: [Author Only](#) [Title Only](#) [Author and Title](#)

FROMM, S., SENKLER, J., ZABALETA, E., PETERHANSEL, C. & BRAUN, H. P. (2016). The carbonic anhydrase domain of plant mitochondrial complex I. *Physiol Plant*, 157(3), 289-296.

Google Scholar: [Author Only](#) [Title Only](#) [Author and Title](#)

FUCHS, P., RUGEN, N., CARRIE, C., ELSASSER, M., FINKEMEIER, I., GIESE, J., HILDEBRANDT, T. M., KUHN, K., MAURINO, V. G., RUBERTI, C., SCHALLENBERG-RUDINGER, M., STEINBECK, J., BRAUN, H. P., EUBEL, H., MEYER, E. H., MULLER-SCHUSSELE, S. J. & SCHWARZLANDER, M. (2020). Single organelle function and organization as estimated from *Arabidopsis* mitochondrial proteomics. *Plant J*, 101(2), 420-441.

Google Scholar: [Author Only](#) [Title Only](#) [Author and Title](#)

GAWRYLUK, R. M. R. & GRAY, M. W. (2010). Evidence for an early evolutionary emergence of gamma-type carbonic anhydrases as components of mitochondrial respiratory complex I. *Bmc Evolutionary Biology*, 10.

Google Scholar: [Author Only](#) [Title Only](#) [Author and Title](#)

GODDARD, T. D., HUANG, C. C., MENG, E. C., PETERSEN, E. F., COUCH, G. S., MORRIS, J. H. & FERRIN, T. E. (2018). UCSF ChimeraX: Meeting modern challenges in visualization and analysis. *Protein Science*, 27(1), 14-25.

Google Scholar: [Author Only](#) [Title Only](#) [Author and Title](#)

GRBA, D. N. & HIRST, J. (2020). Mitochondrial complex I structure reveals ordered water molecules for catalysis and proton translocation. *Nature Structural & Molecular Biology*, 27(10), 892-+.

Google Scholar: [Author Only](#) [Title Only](#) [Author and Title](#)

GUEx, N., PEITSCH, M. C. & SCHWEDE, T. (2009). Automated comparative protein structure modeling with SWISS-MODEL and Swiss-PdbViewer: A historical perspective. *Electrophoresis*, 30, S162-S173.

Google Scholar: [Author Only](#) [Title Only](#) [Author and Title](#)

HANSEN, B. O., MEYER, E. H., FERRARI, C., VAID, N., MOVAHEDI, S., VANDEPOELE, K., NIKOLOSKI, Z. & MUTWIL, M. (2018). Ensemble gene function prediction database reveals genes important for complex I formation in *Arabidopsis thaliana*. *New Phytologist*, 217(4), 1521-1534.

Google Scholar: [Author Only](#) [Title Only](#) [Author and Title](#)

HEAZLEWOOD, J. L., HOWELL, K. A. & MILLAR, A. H. (2003). Mitochondrial complex I from *Arabidopsis* and rice: orthologs of mammalian and fungal components coupled with plant-specific subunits. *Biochimica Et Biophysica Acta-Bioenergetics*, 1604(3), 159-169.

Google Scholar: [Author Only](#) [Title Only](#) [Author and Title](#)

HO, B. K. & GRUSWITZ, F. (2008). HOLLOW: Generating Accurate Representations of Channel and Interior Surfaces in Molecular Structures. *Bmc Structural Biology*, 8.

Google Scholar: [Author Only](#) [Title Only](#) [Author and Title](#)

IVERSON, T. M., ALBER, B. E., KISKER, C., FERRY, J. G. & REES, D. C. (2000). A closer look at the active site of gamma-class carbonic anhydrases: High-resolution crystallographic studies of the carbonic anhydrase from *Methanosarcina thermophila*. *Biochemistry*, 39(31), 9222-9231.

Google Scholar: [Author Only](#) [Title Only](#) [Author and Title](#)

KAMPJUT, D. & SAZANOV, L. A. (2020). The coupling mechanism of mammalian respiratory complex I. *Science*.



Google Scholar: [Author Only Title Only Author and Title](#)

**KISKER, C., SCHINDELIN, H., ALBER, B. E., FERRY, J. G. & REES, D. C. (1996).** A left-handed beta-helix revealed by the crystal structure of a carbonic anhydrase from the archaeon *Methanosarcina thermophila*. *Embo Journal*, 15(10), 2323-2330.

Google Scholar: [Author Only Title Only Author and Title](#)

**KLODMANN, J., SENKLER, M., RODE, C. & BRAUN, H. P. (2011).** Defining the Protein Complex Proteome of Plant Mitochondria. *Plant Physiology*, 157(2), 587-598.

Google Scholar: [Author Only Title Only Author and Title](#)

**KLODMANN, J., SUNDERHAUS, S., NITZ, M., JANSCH, L. & BRAUN, H. P. (2010).** Internal Architecture of Mitochondrial Complex I from *Arabidopsis thaliana*. *Plant Cell*, 22(3), 797-810.

Google Scholar: [Author Only Title Only Author and Title](#)

**LANGE, H., KAUT, A., KISPAL, G. & LILL, R. (2000).** A mitochondrial ferredoxin is essential for biogenesis of cellular iron-sulfur proteins. *Proc Natl Acad Sci U S A*, 97(3), 1050-1055.

Google Scholar: [Author Only Title Only Author and Title](#)

**LAUGHLIN, T. G., BAYNE, A. N., TREMPER, J. F., SAVAGE, D. F. & DAVES, K. M. (2019).** Structure of the complex I-like molecule NDH of oxygenic photosynthesis. *Nature*, 566(7744), 411-+.

Google Scholar: [Author Only Title Only Author and Title](#)

**LETTS, J. A., FIEDORCZUK, K. & SAZANOV, L. A. (2016).** The architecture of respiratory supercomplexes. *Nature*, 537(7622), 644-+.

Google Scholar: [Author Only Title Only Author and Title](#)

**LIGAS, J., PINEAU, E., BOCK, R., HUYNEN, M. A. & MEYER, E. H. (2019).** The assembly pathway of complex I in *Arabidopsis thaliana*. *Plant Journal*, 97(3), 447-459.

Google Scholar: [Author Only Title Only Author and Title](#)

**LILL, R. (2020).** From the discovery to molecular understanding of cellular iron-sulfur protein biogenesis. *Biol Chem*, 401(6-7), 855-876.

Google Scholar: [Author Only Title Only Author and Title](#)

**MALDONADO, M., PADAVANIL, A., ZHOU, L., GUO, F. & LETTS, J. A. (2020).** Atomic structure of a mitochondrial complex I intermediate from vascular plants. *Elife*, 9.

Google Scholar: [Author Only Title Only Author and Title](#)

**MERCHANT, S. S., PROCHNIK, S. E., VALLON, O., HARRIS, E. H., KARPOWICZ, S. J., WITMAN, G. B., TERRY, A., SALAMOV, A., FRITZ-LAYLIN, L. K., MARECHAL-DROUARD, L., MARSHALL, W. F., QU, L. H., NELSON, D. R., SANDERFOOT, A. A., SPALDING, M. H., KAPITONOV, V. V., REN, Q. H., FERRIS, P., LINDQUIST, E., SHAPIRO, H., LUCAS, S. M., GRIMWOOD, J., SCHMUTZ, J., CARDOL, P., CERUTTI, H., CHANFREAU, G., CHEN, C. L., COGNAT, V., CROFT, M. T., DENT, R., DUTCHER, S., FERNANDEZ, E., FUKUZAWA, H., GONZALEZ-BALLESTER, D., GONZALEZ-HALPHEN, D., HALLMANN, A., HANIKENNE, M., HIPPLER, M., INWOOD, W., JABBARI, K., KALANON, M., KURAS, R., LEFEBVRE, P. A., LEMAIRE, S. D., LOBANOV, A. V., LOHR, M., MANUELL, A., MEIR, I., METS, L., MITTAG, M., MITTELMEIER, T., MORONEY, J. V., MOSELEY, J., NAPOLI, C., NEDELCO, A. M., NIYOGI, K., NOVOSELOV, S. V., PAULSEN, I. T., PAZOUR, G., PURTON, S., RAL, J. P., RIANO-PACHON, D. M., RIEKHOF, W., RYMARQUIS, L., SCHRODA, M., STERN, D., UMEN, J., WILLOWS, R., WILSON, N., ZIMMER, S. L., ALLMER, J., BALK, J., BISOVA, K., CHEN, C. J., ELIAS, M., GENDLER, K., HAUSER, C., LAMB, M. R., LEDFORD, H., LONG, J. C., MINAGAWA, J., PAGE, M. D., PAN, J. M., POOTAKHAM, W., ROJE, S., ROSE, A., STAHLBERG, E., TERAUCHI, A. M., YANG, P. F., BALL, S., BOWLER, C., DIECKMANN, C. L., GLADYSHEV, V. N., GREEN, P., JORGENSEN, R., MAYFIELD, S., MUELLER-ROEBER, B., RAJAMANI, S., SAYRE, R. T., BROKSTEIN, P., DUBCHAK, I., GOODSTEIN, D., HORNICK, L., HUANG, Y. W., JHAVERI, J., LUO, Y. G., MARTINEZ, D., NGAU, W. C. A., OTILLAR, B., POLIAKOV, A., PORTER, A., SZAJKOWSKI, L., WERNER, G., ZHOU, K. M., GRIGORIEV, I. V., ROKHSAR, D. S., GROSSMAN, A. R., ANNOTATION, C. & TEAM, J. A. (2007).** The *Chlamydomonas* genome reveals the evolution of key animal and plant functions. *Science*, 318(5848), 245-251.

Google Scholar: [Author Only Title Only Author and Title](#)

**MEYER, E. H. (2012).** Proteomic investigations of complex I composition: how to define a subunit? *Frontiers in Plant Science*, 3.

**MEYER, E. H., HEAZLEWOOD, J. L. & MILLAR, A. H. (2007).** Mitochondrial acyl carrier proteins in *Arabidopsis thaliana* are predominantly soluble matrix proteins and none can be confirmed as subunits of respiratory Complex I. *Plant Mol Biol*, 64(3), 319-327.

Google Scholar: [Author Only Title Only Author and Title](#)

**MURPHY, B. J., KLUSCH, N., LANGER, J., MILLS, D. J., YILDIZ, O. & KUHLBRANDT, W. (2019).** Rotary substates of mitochondrial ATP synthase reveal the basis of flexible F1-Fo coupling. *Science*, 364(6446).

Google Scholar: [Author Only Title Only Author and Title](#)

**NEUHOFF, V., STAMM, R. & EIBL, H. (1985).** Clear Background and Highly Sensitive Protein Staining with Coomassie Blue Dyes in Polyacrylamide Gels - a Systematic Analysis. *Electrophoresis*, 6(9), 427-448.

Google Scholar: [Author Only Title Only Author and Title](#)

**PAREY, K., BRANDT, U., XIE, H., MILLS, D. J., SIEGMUND, K., VONCK, J., KÜHLBRANDT, W. & ZICKERMANN, V. (2018).** Cryo-EM structure of respiratory complex I at work. *Elife*, 7, e39213.

Google Scholar: [Author Only Title Only Author and Title](#)

**PAREY, K., SHARMA, V., HAAPANEN, O., KÖFELER, H., ZÜLLIG, T., WITTIG, I., PRINZ, S., SIEGMUND, K., MILLS, D. J., VONCK, J., KÜHLBRANDT, W. & ZICKERMANN, V. (2019).** High resolution cryo-EM structures of respiratory complex I - mechanism, assembly and

disease. *Science Advances*, , manuscript under review.

Google Scholar: [Author Only Title Only Author and Title](#)

PAREY, K., WIRTH, C., VONCK, J. & ZICKERMANN, V. (2020). Respiratory complex I - structure, mechanism and evolution. *Curr Opin Struct Biol*, 63, 1-9.

Google Scholar: [Author Only Title Only Author and Title](#)

PARISI, G., PERALES, M., FORNASARI, M., COLANERI, A., SCHAIN, N., CASATI, D., ZIMMERMANN, S., BRENNICKE, A., ARAYA, A., FERRY, J., ECHAVE, J. & ZABALETA, E. (2004). Gamma carbonic anhydrases in plant mitochondria. *Plant Mol. Biol.*, 55, 193-207.

Google Scholar: [Author Only Title Only Author and Title](#)

PERALES, M., PARISI, G., FORNASARI, M., COLANERI, A., VILLARREAL, F., GONZALEZ-SCHAIN, N., ECHAVE, J., GOMEZ-CASATI, D., BRAUN, H. P., ARAYA, A. & ZABALETA, E. (2004). Gamma carbonic anhydrase like complex interact with plant mitochondrial complex I. *Plant Mol Biol*, 56(6), 947-957.

Google Scholar: [Author Only Title Only Author and Title](#)

PETERS, K., BELT, K. & BRAUN, H. P. (2013). 3D Gel Map of Arabidopsis Complex I. *Frontiers in Plant Science*, 4, 153.

Google Scholar: [Author Only Title Only Author and Title](#)

PETTERSEN, E. F., GODDARD, T. D., HUANG, C. C., COUCH, G. S., GREENBLATT, D. M., MENG, E. C. & FERRIN, T. E. (2004). UCSF Chimera—a visualization system for exploratory research and analysis. *J Comput Chem*, 25(13), 1605-1612.

Google Scholar: [Author Only Title Only Author and Title](#)

RAIS, I., KARAS, M. & SCHAGGER, H. (2004). Two-dimensional electrophoresis for the isolation of integral membrane proteins and mass spectrometric identification. *Proteomics*, 4(9), 2567-2571.

Google Scholar: [Author Only Title Only Author and Title](#)

SAZANOV, L. A. (2015). A giant molecular proton pump: structure and mechanism of respiratory complex I. *Nature Reviews Molecular Cell Biology*, 16(6), 375-388.

Google Scholar: [Author Only Title Only Author and Title](#)

SCHERTL, P., SUNDERHAUS, S., KLODMANN, J., GROZEFF, G. E. G., BARTOLI, C. G. & BRAUN, H. P. (2012). L-Galactono-1,4-lactone dehydrogenase (GLDH) Forms Part of Three Subcomplexes of Mitochondrial Complex I in *Arabidopsis thaliana*. *Journal of Biological Chemistry*, 287(18), 14412-14419.

Google Scholar: [Author Only Title Only Author and Title](#)

SCHULLER, J. M., BIRRELL, J. A., TANAKA, H., KONUMA, T., WULFLHORST, H., COX, N., SCHULLER, S. K., THIEMANN, J., LUBITZ, W., SETIF, P., IKEGAMIS, T., ENGEL, B. D., KURISU, G. & NOWACZYK, M. M. (2019). Structural adaptations of photosynthetic complex I enable ferredoxin-dependent electron transfer. *Science*, 363(6424), 257-+.

Google Scholar: [Author Only Title Only Author and Title](#)

SCHULLER, J. M., SAURA, P., THIEMANN, J., SCHULLER, S. K., GAMIZ-HERNANDEZ, A. P., KURISU, G., NOWACZYK, M. M. & KAILA, V. R. I. (2020). Redox-coupled proton pumping drives carbon concentration in the photosynthetic complex I. *Nat Commun*, 11(1).

Google Scholar: [Author Only Title Only Author and Title](#)

SENKLER, J., SENKLER, M. & BRAUN, H. P. (2017a). Structure and function of complex I in animals and plants - a comparative view. *Physiol Plant*, 161(1), 6-15.

Google Scholar: [Author Only Title Only Author and Title](#)

SENKLER, J., SENKLER, M., EUBEL, H., HILDEBRANDT, T., LENGWENUS, C., SCHERTL, P., SCHWARZLANDER, M., WAGNER, S., WITTIG, I. & BRAUN, H. P. (2017b). The mitochondrial complexome of *Arabidopsis thaliana*. *Plant Journal*, 89(6), 1079-1092.

Google Scholar: [Author Only Title Only Author and Title](#)

SOUFARI, H., PARROT, C., KUHN, L., WALTZ, F. & HASHEM, Y. (2020). Specific features and assembly of the plant mitochondrial complex I revealed by cryo-EM. *Nat Commun*, 11(1), 5195.

Google Scholar: [Author Only Title Only Author and Title](#)

SUNDERHAUS, S., DUDKINA, N. V., JÄNSCH, L., KLODMANN, J., HEINEMEYER, J., PERALES, M., ZABALETA, E., BOEKEMA, E. J. & BRAUN, H.-P. (2006). Carbonic anhydrase subunits form a matrix-exposed domain attached to the membrane arm of mitochondrial complex I in plants. *J. Biol. Chem.*, 281, 6482-6488.

Google Scholar: [Author Only Title Only Author and Title](#)

TAKABAYASHI, A., TAKABAYASHI, S., TAKAHASHI, K., WATANABE, M., UCHIDA, H., MURAKAMI, A., FUJITA, T., IKEUCHI, M. & TANAKA, A. (2017). PCoM-DB Update: A Protein Co-Migration Database for Photosynthetic Organisms. *Plant and Cell Physiology*, 58(1).

Google Scholar: [Author Only Title Only Author and Title](#)

TAKUBO, K., MORIKAWA, T., NONAKA, Y., MIZUTANI, M., TAKENAKA, S., TAKABE, K., TAKAHASHI, M. A. & OHTA, D. (2003). Identification and molecular characterization of mitochondrial ferredoxins and ferredoxin reductase from *Arabidopsis*. *Plant Mol Biol*, 52(4), 817-830.

Google Scholar: [Author Only Title Only Author and Title](#)

THAL, B., BRAUN, H. P. & EUBEL, H. (2018). Proteomic analysis dissects the impact of nodulation and biological nitrogen fixation on *Vicia faba* root nodule physiology. *Plant Mol Biol*, 97(3), 233-251.

Google Scholar: [Author Only](#) [Title Only](#) [Author and Title](#)

**WALKER, J. E., ARIZMENDI, J. M., DUPUIS, A., FEARNLEY, I. M., FINEL, M., MEDD, S. M., PILKINGTON, S. J., RUNSWICK, M. J. & SKEHEL, J. M. (1992).** Sequences of 20 Subunits of NADH - Ubiquinone Oxidoreductase from Bovine Heart-Mitochondria - Application of a Novel Strategy for Sequencing Proteins Using the Polymerase Chain-Reaction. *Journal of Molecular Biology*, 226(4), 1051-1072.

Google Scholar: [Author Only](#) [Title Only](#) [Author and Title](#)

**WITTIG, I., BRAUN, H. P. & SCHAGGER, H. (2006).** Blue native PAGE. *Nat Protoc*, 1(1), 418-428.

Google Scholar: [Author Only](#) [Title Only](#) [Author and Title](#)

**ZHANG, C. L., SHUAI, J., RAN, Z. X., ZHAO, J. H., WU, Z. F., LIAO, R. J., WU, J., MA, W. M. & LEI, M. (2020).** Structural insights into NDH-1 mediated cyclic electron transfer. *Nat Commun*, 11(1).

Google Scholar: [Author Only](#) [Title Only](#) [Author and Title](#)

**ZHU, J., VINOTHKUMAR, K. R. & HIRST, J. (2016).** Structure of mammalian respiratory complex I. *Nature*, 536(7616), 354-358.

Google Scholar: [Author Only](#) [Title Only](#) [Author and Title](#)

**ZICKERMANN, V., WIRTH, C., NASIRI, H., SIEGMUND, K., SCHWALBE, H., HUNTE, C. & BRANDT, U. (2015).** Structural biology. Mechanistic insight from the crystal structure of mitochondrial complex I. *Science*, 347(6217), 44-49.

Google Scholar: [Author Only](#) [Title Only](#) [Author and Title](#)
